1 Mapping the unique and shared functions of  
2 oncogenic KRAS and RIT1 with proteome and  
3 transcriptome profiling

4 April Lo<sup>1,2\*</sup>, Kristin Holmes<sup>1,2\*</sup>, Filip Mundt<sup>3,4,5</sup>, Sitapriya Moorthi<sup>1</sup>, Iris Fung<sup>3</sup>, Shaunt  
5 Fereshetian<sup>3</sup>, Jackie Watson<sup>3</sup>, Steven A. Carr<sup>3</sup>, Philipp Mertins<sup>3,6</sup>, Alice H. Berger<sup>1,2</sup>

6  
7 1. Human Biology Division, Fred Hutchinson Cancer Research Center, Seattle, WA,  
8 USA

9 2. Genome Sciences Department, University of Washington, Seattle, WA, USA

10 3. Proteomics Platform, Broad Institute of MIT and Harvard, Cambridge, MA, USA

11 4. Department of Oncology-Pathology, Karolinska Institute, Stockholm, Sweden

12 5. Present address: Novo Nordisk Foundation center for Protein Research, Clinical  
13 Proteomics, University of Copenhagen, Denmark

14 6. Present address: Proteomics Platform, Max Delbrück Center for Molecular Medicine  
15 in the Helmholtz Society, Berlin, Germany

16

17 **corresponding author(s): Alice Berger (ahberger@fredhutch.org)**

18

## 19 Abstract

20  
21 Aberrant activation of RAS oncogenes is prevalent in lung adenocarcinoma, with somatic  
22 mutation of *KRAS* occurring in ~30% of tumors. Recently, we identified somatic mutation of the  
23 RAS-family GTPase *RIT1* in lung adenocarcinoma, but relatively little is known about the  
24 biological pathways regulated by RIT1 and how these relate to the oncogenic *KRAS* network.  
25 Here we present quantitative proteomic and transcriptomic profiles from *KRAS*-mutant and  
26 *RIT1*-mutant isogenic lung epithelial cells and globally characterize the signaling networks  
27 regulated by each oncogene. We find that both mutant *KRAS* and mutant RIT1 promote S6  
28 kinase, AKT, and RAF/MEK signaling, and promote epithelial-to-mesenchymal transition and  
29 immune evasion via HLA protein loss. However, *KRAS* and RIT1 diverge in regulation of  
30 phosphorylation sites on EGFR, USO1, and AHNAK proteins. The majority of the proteome  
31 changes are related to altered transcriptional regulation, but a small subset of proteins are  
32 differentially regulated by both oncoproteins at the post-transcriptional level, including  
33 intermediate filament proteins, metallothioneins, and MHC Class I proteins. These data provide  
34 the first global, unbiased characterization of oncogenic RIT1 network and identify the shared  
35 and divergent functions of oncogenic RIT1 and *KRAS* GTPases in lung cancer.

36

## 37 Introduction

38 Somatic mutation of the *KRAS* proto-oncogene is a prevalent feature of human cancers,  
39 particularly in lung adenocarcinomas where *KRAS* is mutated in up to 30% of tumors. Cancer-  
40 associated variants such as G12V and Q61H alter the normal regulation of *KRAS* GTPase  
41 activity by disrupting GTP hydrolysis activity or physical interaction with GTPase-activating  
42 proteins (GAPs)<sup>1,2</sup>, resulting in heightened downstream cellular signaling through the canonical  
43 RAS effector pathways RAF/MEK and PI3K/AKT as well as others. Following the discovery of

44 cancer-associated RAS mutations in the 1980s<sup>3,4</sup>, thousands of studies have delineated the  
45 critical pathways involved in RAS-mediated cellular transformation, metastasis, and metabolism.

46  
47 Recently, another RAS-family GTPase gene, *RIT1*, was found to harbor somatic mutations in  
48 lung cancer<sup>5</sup> and myeloid leukemias<sup>6</sup>. Interestingly, germline *RIT1* mutations are found in  
49 families with Noonan Syndrome, a developmental “RAS”-opathy involving altered craniofacial  
50 morphology and cardiac abnormalities<sup>7</sup>, and which can also be caused by germline mutations in  
51 *KRAS* itself or other RAS-pathway genes such as *SOS1*, *SOS2*, *LZTR1* and *SHOC2*  
52 (<https://omim.org/>). In cancer and development, *RIT1* mutations are found in cases that lack  
53 canonical *KRAS* mutations, suggesting that *RIT1* may impart the same phenotypes conferred by  
54 activation of RAS.

55  
56 Prior studies have characterized the role of RIT1 in neural development<sup>8</sup> and we and others  
57 have described the role of mutant RIT1 in cellular transformation<sup>5,9,10</sup>, knowledge of the function  
58 of cancer- and Noonan-associated *RIT1* variants is relatively limited. Unlike *KRAS*, *RIT1*  
59 mutations are rarely observed near the critical glycine residues involved in GTP hydrolysis (e.g.  
60 G12 and G13 in *KRAS* or G30 and G31 in *RIT1*). Instead, *RIT1* mutations occur most frequently  
61 near the switch II domain, also targeted by Q61 *KRAS* variants (**Fig. 1a**). Nevertheless, these  
62 mutations may enhance GTP-bound levels of RIT1<sup>11,12</sup>. The molecular consequences of RIT1  
63 switch II domain mutations may additionally be linked to the loss of RIT1’s physical interaction  
64 with LZTR1, a ubiquitin-conjugating enzyme responsible for degradation of RIT1<sup>11</sup>. Cancer- and  
65 Noonan-associated RIT1 variants lose the ability to interact with LZTR1 and consequently are  
66 highly overexpressed, resulting in increased signaling activity through the RAF/MEK pathway<sup>11</sup>.

67

68 Prior studies of RIT1 function focus on candidate cellular signaling pathways based on RIT1's  
69 homology to KRAS. To our knowledge, unbiased mapping of downstream RIT1-regulated  
70 pathways has not been performed to date. Here we sought to broadly describe the proteome,  
71 phosphoproteome, and transcriptome changes induced by wild-type RIT1 and RIT1<sup>M90I</sup>, a  
72 cancer- and Noonan-associated variant, and to compare these changes to those induced by  
73 oncogenic KRAS variants. With a particular interest in the consequences of RIT1<sup>M90I</sup> in lung  
74 cancer, we profiled the effects of RIT1<sup>M90I</sup> mutation in AALE cells, a non-transformed,  
75 immortalized, human lung epithelial cell line<sup>13</sup>.

76  
77 By comparing the downstream pathways regulated by oncogenic KRAS and RIT1, we uncover  
78 previously unknown consequences of RIT1 activation, such as induction of the epithelial-to-  
79 mesenchymal transition (EMT) and post-translational regulation of HLA protein expression. In  
80 addition, we uncover additional functional differences between KRAS and RIT1 including a  
81 distinct and unique role of KRAS mutants in regulation of EGFR and USO1 phosphorylation.  
82 These data provide the first systems-level view of RIT1 and RIT1<sup>M90I</sup> function.

83

## 84 Results

85

### 86 Multi-omic profiling of RIT1- and RAS-transformed human lung epithelial cells

87 We previously demonstrated that RIT1<sup>M90I</sup> and other cancer-associated RIT1 variants can  
88 promote cellular transformation of NIH3T3 cells in vitro and in vivo<sup>5</sup>. To determine whether  
89 RIT1<sup>M90I</sup> was capable of transforming human lung epithelial cells, we expressed mutant RIT1 or  
90 KRAS in the human lung epithelial cell line, AALE. Similar to our previous findings in rodent  
91 cells, both RIT1<sup>M90I</sup> and KRAS<sup>G12V</sup> enabled AALE cells to form colonies in soft agar (**Fig. 1b**).

92

93 The canonical function of oncogenic RAS variants is the downstream activation of the  
94 RAF/MEK/ERK cellular signaling cascade<sup>14</sup>, and RIT1 shares the ability to bind C-RAF and  
95 induce transcription of ERK target genes activity<sup>11</sup>. To determine if such regulation is active in  
96 AALE cells, we stably expressed wild-type RIT1 or KRAS, or the mutant forms RIT1<sup>M90I</sup>,  
97 KRAS<sup>G12V</sup>, and KRAS<sup>Q61H</sup> in AALE cells. KRAS<sup>Q61H</sup> was included since this mutant more closely  
98 resembles the switch II domain mutants observed in *RIT1* in cancer (**Fig. 1a**). RIT1<sup>M90I</sup>,  
99 KRAS<sup>G12V</sup>, and KRAS<sup>Q61H</sup> all enhanced ERK phosphorylation compared to their respective wild-  
100 type protein or vector control (**Fig. 1c**). Interestingly, wild-type RIT1 overexpression also  
101 modestly enhanced ERK phosphorylation whereas wild-type KRAS suppressed basal ERK  
102 phosphorylation.

103

104 To systematically characterize the signaling networks perturbed by mutant RIT1 and KRAS in  
105 lung cancer, we expressed each variant in AALE cells and performed both RNA-seq and deep  
106 proteome and phosphoproteome profiling by liquid chromatography tandem mass spectrometry  
107 (LC-MS/MS). Following trypsin digestion, peptides were labeled with tandem mass tag (TMT)  
108 reagents in two overlapping 10-plex sets for relative quantification of proteome and  
109 phosphopeptides by LC-MS/MS (**Fig. 1d and Supplementary Fig. 1a-b**). Following basic  
110 reverse phase chromatography, fractions were either directly subjected to LC-MS/MS for total  
111 proteome quantification, or subjected to immobilized metal affinity chromatography (IMAC) to  
112 enrich for phosphopeptides and then subjected to LC-MS/MS, or. In total, we identified 10,131  
113 proteins, 9002 of which were detected and quantified in every sample, and 29,140  
114 phosphopeptides, 12,325 of which were identified in common in every sample (**Supplementary**  
115 **Tables 1 and 2 and Supplementary Files 1 and 2**).

116

117 In parallel, we generated deep transcriptome profiles of the same isogenic cell lines.  
118 Transcriptome profiling was performed in triplicate on the Illumina NovaSeq platform to a  
119 median read-depth per replicate of 70.1 million reads (**Fig. 1e, Supplementary Table 3 and**  
120 **Supplementary Fig. 1e**). No compensatory feedback regulation of RIT1 to KRAS or vice versa  
121 was observed (**Fig. 1f**). Despite relatively low protein expression of KRAS variants in the AALE  
122 lines (**Fig. 1c**), the majority of KRAS transcripts in each isogenic cell line corresponded to G12V  
123 or Q61H variants, respectively, with 84.1% of reads harboring the G12V variant in KRAS<sup>G12V</sup>  
124 cells, and 73.3% of reads corresponding to the Q61H allele in KRAS<sup>Q61H</sup> cells (**Fig. 1g**). As  
125 expected, known KRAS-regulated gene sets were strongly up- and down-regulated in KRAS-  
126 mutant cells (**Supplementary Fig. 1d**).

127

## 128 **Multi-omic profiling identifies global similarity between signaling regulated by RIT1<sup>M90I</sup>** 129 **and oncogenic KRAS**

130 Differentially abundant proteins were identified by comparison to the vector control cells using a  
131 two-tailed moderated t-test (**Fig. 2a**). Selected proteins observed to be significantly modulated  
132 by LC-MS/MS were cross-validated by Western blot. FOSL1, also known as FRA1, is a basic  
133 leucine zipper transcription factor in the FOS family<sup>15</sup>. Activation of RAS is known to promote  
134 transcriptional upregulation and protein stabilization of FOSL1<sup>16,17</sup>. By LC-MS/MS, FOSL1 was  
135 markedly overexpressed in KRAS<sup>G12V</sup>, KRAS<sup>Q61H</sup>, and RIT1<sup>M90I</sup>-mutant cells compared to wild-  
136 type cells or vector control cells (**Fig. 2b**). Consistently, Western blot of independently-derived  
137 AALE isogenic lines demonstrated greater abundance of FOSL1 in KRAS- or RIT1-mutant cells  
138 compared to wild-type expressing cells (**Fig. 2b**). TXNIP is an inhibitor of thioredoxin involved in  
139 both redox regulation and glucose metabolism<sup>18,19</sup>. Prior literature identified HRAS<sup>G12V</sup>-induced  
140 suppression of TXNIP transcription and protein translation<sup>20,21</sup>. TXNIP was among the top down-  
141 regulated proteins in KRAS- and RIT1-mutant proteomes, and was decreased in Western blot

142 analysis of independently derived cells (**Fig. 2c**). These validation data demonstrate the utility of  
143 LC-MS/MS to describe protein expression changes and additionally suggest the mechanism of  
144 RAS-mediated modulation of FOSL1 and TXNIP is shared with RIT1<sup>M90I</sup>.

145

146 Next we compared the global effects of RIT1<sup>WT</sup> and RIT1<sup>M90I</sup> to that of KRAS<sup>WT</sup> and KRAS  
147 variants. Proteome and phosphoproteome data from RIT1<sup>M90I</sup>-expressing cells were highly  
148 correlated with KRAS<sup>G12V</sup> and KRAS<sup>Q61H</sup> profiles, suggesting largely similar downstream  
149 consequences ( $r = 0.70-0.80$  and  $0.72-0.75$  for proteome and phosphoproteome, respectively;  
150 **Fig. 2d**). Despite differences in KRAS protein abundance, KRAS<sup>G12V</sup> and KRAS<sup>Q61H</sup> proteomes  
151 and phosphoproteomes were highly correlated (proteome  $r = 0.85$  and phospho  $r = 0.79$ ; **Fig.**  
152 **2d**). In contrast, wild-type KRAS replicates were the most divergent of all profiles, showing  
153 limited correlation to either the KRAS-mutant profiles or RIT1 profiles.

154

155 A recent study found that RIT1 variants, including M90I, may function by relieving negative  
156 regulation of RIT1 by a LZTR1-dependent proteasomal degradation mechanism<sup>11</sup>. Accordingly,  
157 overexpression of wild-type RIT1 should largely phenocopy expression of RIT1<sup>M90I</sup>. Consistent  
158 with this idea, RIT1<sup>WT</sup> cells more closely resembled both RIT1<sup>M90I</sup> and KRAS-mutant cells than  
159 KRAS<sup>WT</sup> cells (**Fig. 2d**). These data highlight a critical divergence between KRAS and RIT1:  
160 expression of wild-type KRAS is not capable of activating downstream oncogenic pathways,  
161 whereas expression of wild-type RIT1 in part resembles activation of RIT1 or KRAS by  
162 mutation. We confirmed this observation in a principal component analysis of transcriptome  
163 data, which further revealed a high degree of similarity between RIT1<sup>WT</sup> and RIT1<sup>M90I</sup>-regulated  
164 gene expression (**Fig. 2e and Supplementary Table 4**).

165

166

## 167 **Oncogenic RIT1 promotes epithelial-to-mesenchymal transition**

168 To identify the downstream pathways regulated by oncogenic KRAS and RIT1, we performed  
169 gene set overlap analysis using MSigDB Hallmark Pathway gene sets<sup>22</sup> (**Fig. 3a**). The epithelial-  
170 to-mesenchymal transition (EMT) pathway was the most significant gene set enriched among  
171 up-regulated proteins for both KRAS<sup>G12V</sup>/KRAS<sup>Q61H</sup> and RIT1<sup>WT</sup>/RIT1<sup>M90I</sup> cell lines. EMT is a  
172 cellular transdifferentiation process promoted by cell-extrinsic signaling proteins and  
173 orchestrated by activation of transcription factors such as Twist, Snail, and Zeb family  
174 transcription factors<sup>23</sup>. It has long been observed that oncogenic RAS proteins, including KRAS  
175 mutants, promote EMT. An EMT-signature is associated with KRAS dependence<sup>24</sup>, which has  
176 been functionally linked to activation of FOSL1<sup>25</sup>. Interestingly, we find both RIT1<sup>M90I</sup> and  
177 KRAS<sup>G12V</sup>/KRAS<sup>Q61H</sup> are capable of promoting expression changes of key EMT markers,  
178 including up-regulation of Vimentin, N-Cadherin, and Fibronectin, and downregulation of Keratin  
179 19 (**Fig. 3b and Supplementary Fig. 2a**). Although canonical EMT transcription factors Snail  
180 (SNA1) and Slug (SNA2) were not detected by proteomic analysis, transcriptomes from RIT1-  
181 and KRAS-mutant cells showed increased activity of these EMT transcription factors as  
182 determined by ChEA3 transcription factor enrichment analysis (**Fig. 3c-d and Supplementary**  
183 **Fig. 2b**). To our knowledge, this is the first demonstration of mutant RIT1 promoting EMT in any  
184 cell type.

185

## 186 **Oncogenic KRAS and RIT1 suppress Class I MHC expression via a post-transcriptional** 187 **mechanism**

188 Among the top suppressed proteins with differential abundance in both mutant KRAS and  
189 RIT1<sup>M90I</sup> cells, were major histocompatibility complex (MHC) proteins. Class I MHC proteins  
190 HLA-A, HLA-B, HLA-C, and HLA-F were potently suppressed by KRAS<sup>G12V</sup>, KRAS<sup>Q61H</sup>, and  
191 RIT1<sup>M90I</sup> (**Fig. 4a-b and Supplementary Fig. 3a**). Recently there has been a renewed interest



192 in expression of immune modulatory proteins in cancer due to the appreciation of the potent role  
193 of the immune system in shaping cancer evolution. Further understanding the regulation of HLA  
194 expression in cancer is particularly critical in metastatic *KRAS*-mutant lung adenocarcinoma,  
195 where chemotherapy combined with immune checkpoint blockade is often used in the first-line  
196 setting.

197  
198 Class I MHC genes *HLA-A*, *HLA-B*, and *HLA-C* harbor loss-of-function mutations in cancer<sup>26</sup>,  
199 demonstrating selective pressure to lose MHC function during tumorigenesis. Both MHC  
200 expression loss and upregulation of the immune suppressive protein PD-L1 enable tumor  
201 evasion of T-cell recognition of aberrant cancer cell proteins<sup>27</sup>. Moreover, expression loss of  
202 HLA proteins or B2M, another MHC Class I complex protein, is associated with resistance to  
203 immunotherapy in cancer<sup>28</sup>. We found that *RIT1*<sup>M90I</sup>, *KRAS*<sup>G12V</sup>, and *KRAS*<sup>Q61H</sup> cells all promoted  
204 loss of B2M protein abundance in addition to HLA protein loss (**Fig. 4c**).

205  
206 Class I MHC expression is known to be dynamically regulated by upstream signals controlled by  
207 interferon gamma exposure, NF- $\kappa$ B signaling, and chromatin regulators such as EZH2<sup>29,30</sup>. Each  
208 of these mechanisms involves transcriptional regulation of class I MHC genes. However, there  
209 were no transcriptional differences in HLA genes in the *KRAS*-mutant and *RIT1*-mutant cells nor  
210 were any transcriptional differences observed in the upstream regulators of MHC Class I  
211 expression *NLRC5* and *IRF1* and *IRF2* (**Supplementary Fig. 3b**). Moreover, we excluded the  
212 possibility that lentiviral transduction or expression of a foreign antigen was responsible for the  
213 HLA suppression, because HLA protein expression was maintained or enhanced in *RIT1*<sup>WT</sup>-  
214 expressing cells as well as vector control cells, which express the Renilla luciferase gene.

215

216 To identify the possible mechanism of RIT1<sup>M90I</sup>- and KRAS-mediated MHC suppression, we  
217 identified other proteins that, like HLA, were upregulated in RIT1<sup>WT</sup> cells but suppressed in  
218 RIT1-mutant and KRAS-mutant cells (**Fig. 4d**). This analysis revealed the pervasive  
219 downregulation of the Rab-mediated ER/Golgi vesicle-trafficking pathway that controls MHC  
220 Class I processing and presentation as well as the MHC Class I complex proteins themselves  
221 (**Fig. 4e**). In addition, expression of the proteasomal subunit PSMB9 correlated with loss of the  
222 MHC processing machinery (**Fig. 4f and Supplementary Fig. 3c**). Loss of PSMB9, also known  
223 as LMP2, has been previously linked to loss of MHC expression after oncogenic  
224 transformation<sup>31</sup>. We conclude that RIT1<sup>M90I</sup> and KRAS<sup>G12V</sup>/KRAS<sup>Q61H</sup> suppress MHC Class I  
225 expression through a post-transcriptional mechanism possibly involving PSMB9. Further  
226 investigation of MHC Class I expression loss driven by these oncogenic RIT1 and KRAS is  
227 critical to better understand the role of RAS and RIT1 signaling on immune evasion in cancer.

228  
229 The identification of a major class of proteins regulated at the post-transcriptional level in RIT1-  
230 and KRAS-transformed lung epithelial cells brought to our attention the possibility of other post-  
231 transcriptional regulation by RIT1 and KRAS. Indeed, oncogenic RAS signaling profoundly  
232 alters cap-dependent translation via activation of the p90 ribosomal S6 kinases (RSKs)<sup>32</sup> and  
233 PI3K/mTOR<sup>33</sup>, so differential protein translation could significantly contribute to altered protein  
234 abundance in RAS-transformed cells. To determine whether there were other protein classes in  
235 addition to MHC Class I proteins with significant post-transcriptional regulation, we performed a  
236 global correlation analysis of the transcriptome and proteome. Significant linear correlations  
237 between transcript and protein abundance were observed for RIT1 and KRAS variants, with the  
238 correlation highest for cells expressing mutant KRAS<sup>G12V</sup> ( $r = 0.3725$ ) or KRAS<sup>Q61H</sup> ( $r = 0.3620$ )  
239 (**Fig. 4g**). While expression of the majority of genes were correlated at the RNA and protein  
240 levels, the metallothionein protein family including MT1E, MT1F and MT1X was highly

241 upregulated in the proteome but not transcriptome of KRAS-mutant cells (**Fig. 4g**). In addition,  
242 intermediate filament proteins were also substantially regulated post-transcriptionally; both  
243 alpha-internexin (INA) and vimentin (VIM) were expressed more highly in the proteome than  
244 expected from RNA-seq data (**Fig. 4g**). These data highlight the utility of LC-MS/MS to identify  
245 protein abundance changes that would not be predicted from transcriptome analysis.

246

### 247 **Phosphoproteome profiling illuminates shared and unique signaling by RIT1 and KRAS**

248 Protein phosphorylation is a reversible and dynamic mechanism of intracellular signaling that  
249 enables rapid intracellular transduction of signals controlling cell proliferation, survival, and  
250 metabolism. Although both RIT1 and KRAS act as GTPase switches, they both stimulate  
251 activation of cellular protein kinases such as BRAF. We therefore evaluated protein  
252 phosphorylation regulated by wild-type and mutant RIT1 and KRAS. Phosphosite abundance  
253 was expressed as a relative abundance normalized to the total protein abundance for each  
254 phosphoprotein. Unsupervised hierarchical clustering of the phospho-signatures identified the  
255 RIT1<sup>M90I</sup> phosphoproteome as most similar to KRAS<sup>G12V</sup> and KRAS<sup>Q61H</sup> phospho-signatures  
256 (**Supplementary Fig. 4a**). We performed Kinase-Substrate Enrichment Analysis (KSEA<sup>34</sup>),  
257 which uses kinase-substrate pairings from PhosphoSitePlus<sup>35</sup> and NetworKIN<sup>36</sup> to identify  
258 differential phosphorylation of kinase-substrate families (**Supplementary Table 5**). These data  
259 further confirmed the similarity in phosphorylation state between RIT1-mutant and KRAS-mutant  
260 cells. The top kinases with increased substrate phosphorylation in RIT1-mutant and KRAS-  
261 mutant cells were ribosomal S6 kinase (RPS6KA1), Protein kinase C (PRKCA), AKT1, and  
262 MAPKAPK2 (**Fig. 5a-c**, **Supplementary Fig. 4b-e**, and **Supplementary Table 5**). The levels of  
263 phosphorylation of RPS6KA1 and MAPKAPK2 substrates were enhanced most strongly in the  
264 mutant cells and less in RIT1 WT and KRAS WT-expressing cells (**Fig. 5b-c**). Substrates of  
265 Aurora kinase B and CDK1 and PAK1 were suppressed in RIT1- and KRAS-mutant cells (**Fig.**

266 **5a and Supplementary Fig. 4b-c and Supplementary Fig. 4f).** Although the total  
267 phosphorylation of each substrate reflects the balance between kinases and phosphatases in  
268 the cell, these data suggest that RIT1<sup>M90I</sup>, like oncogenic KRAS, can activate the canonical RAS  
269 effector pathways involving S6 kinase and AKT.

270  
271 Next we assessed the divergent functions of RIT1<sup>M90I</sup> and KRAS<sup>G12V</sup>/KRAS<sup>Q61H</sup> by identifying  
272 proteins with differential phosphorylation in KRAS-mutant versus RIT1<sup>M90I</sup>-mutant cells. 902  
273 differentially phosphorylated sites were identified by two-tailed t-test and multiple hypothesis  
274 correction (**Fig. 5d; FDR < 0.05**). Interestingly, the top site with lower phosphorylation in  
275 KRAS<sup>G12V</sup> and KRAS<sup>Q61H</sup> cells was EGFR serine 1026 (**Fig. 5d**). In lung adenocarcinoma, KRAS  
276 mutations and EGFR mutations are mutually exclusive, suggesting a powerful genetic  
277 interaction between these two genes. Recent work demonstrated that mutant KRAS and EGFR  
278 display synthetic lethality<sup>37</sup>. However the mechanism underlying this lethality is unknown.  
279 Further inspection of the phospho-proteome signatures revealed extensive alteration of EGFR  
280 phosphorylation by KRAS<sup>G12V</sup> and KRAS<sup>Q61H</sup>, but not by RIT1<sup>M90I</sup>. 11 of 12 EGFR sites detected  
281 by LC-MS/MS occur in the cytoplasmic carboxy-terminal tail of EGFR (**Fig. 5e**). Five of these  
282 sites (S991, S991/T993 double phosphorylation, S1026, S1039, and T1041/S1045 double  
283 phosphorylation) were significantly depleted of phosphorylation in KRAS<sup>G12V</sup> and KRAS<sup>Q61H</sup>-  
284 expressing cells but not in RIT1<sup>M90I</sup>-expressing cells. Interestingly, these sites lie in a region of  
285 EGFR that is involved in receptor internalization and endocytosis<sup>38</sup> and a phosphorylation-  
286 deficient mutant at S991 is defective at internalization<sup>39</sup>. Consistently, EGFR protein abundance  
287 was increased in KRAS-mutant cells (**Supplementary Fig. 4g**) Although the specific regulatory  
288 mechanisms leading to this depletion remain unknown, these data point to the existence of  
289 feedback regulatory signaling from oncogenic KRAS to EGFR.

290

291 Examining phosphorylation uniquely promoted by KRAS<sup>G12V</sup> and KRAS<sup>Q61H</sup>, we identified USO1  
292 phosphorylation at S48 as one of the top most significantly increased phosphorylation events in  
293 KRAS-mutant cells. USO1, also known as p115, is a vesicle tethering factor involved in ER-  
294 Golgi intracellular trafficking<sup>40</sup>. Although wild-type KRAS and KRAS-mutant proteomic  
295 signatures were largely divergent, USO1 serine 48 phosphorylation was promoted by both  
296 KRAS<sup>WT</sup> and mutant KRAS (**Fig. 5f**). KRAS relies on vesicle trafficking to ensure proper post-  
297 translational farnesylation and palmitoylation, which are required for targeting of KRAS to the  
298 plasma membrane<sup>41</sup>. We hypothesized that USO1 S48 phosphorylation was therefore  
299 correlated with KRAS expression rather than activity. Indeed, a significant correlation was  
300 observed between overall KRAS expression and USO1 phosphorylation (**Fig. 5g**). In contrast,  
301 USO1 S48 phosphorylation was only modestly changed in RIT1-mutant cells (**Fig. 5d**). Notably,  
302 RIT1 lacks the farnesylation and palmitoylation signals present in RAS isoforms<sup>42</sup>, so the  
303 differential regulation of USO1 by KRAS and RIT1 may be related to differences in RIT1 and  
304 KRAS trafficking.

305  
306 Also among the top differentially phosphorylated sites were 32 phosphorylation sites in AHNAK  
307 proteins 1 and 2. AHNAK and AHNAK2 are large scaffolding proteins that have been implicated  
308 as tumor suppressor proteins in breast and lung cancer<sup>43,44</sup>. Among all phospho-proteins, a  
309 higher proportion (32/117) of sites on AHNAK and AHNAK2 were differentially phosphorylated  
310 than expected by chance ( $P < 0.0001$  by Chi Square test; **Supplementary Fig. 4h**). Intriguingly,  
311 two recent proximity-labeling proteomic studies identified AHNAK and AHNAK2 as KRAS-  
312 interacting proteins<sup>45,46</sup>, raising the possibility that a direct physical interaction between KRAS  
313 and AHNAK proteins may be involved in the differential AHNAK phosphorylation we observe.

314

## 315 Discussion

316  
317 Here we describe quantitative proteomic, phosphoproteomic, and transcriptomic datasets that  
318 provide the first systematic view of the RIT1<sup>M90I</sup>-regulated signaling network. These datasets  
319 were generated from isogenic human lung epithelial cells to provide a physiological view of the  
320 consequences of RIT1 activation in the same cellular compartment that is involved in lung  
321 adenocarcinoma, a tumor type with prevalent mutations in *KRAS* and *RIT1*. Broadly, we find  
322 that 'omic signatures from RIT1<sup>M90I</sup>-expressing cells largely phenocopy those from cells with  
323 overexpression of wild-type RIT1. This finding lends further support to the notion that oncogenic  
324 RIT1 variants function at least in part through increasing RIT1 abundance<sup>11</sup>. This is in contrast  
325 to *KRAS*, where overexpression of wild-type *KRAS* induces signatures unrelated or opposite to  
326 that of oncogenic *KRAS* variants G12V and Q61H. The opposing functions of wild-type and  
327 mutant *KRAS* is consistent with recent evidence suggesting that *KRAS* functions as a dimer and  
328 that wild-type *KRAS* directly inhibits the function of oncogenic *KRAS* variants via physical  
329 dimerization<sup>47</sup>. This divergence in the function of wild-type RIT1 and *KRAS* hints at fundamental  
330 differences in molecular regulation of each wild-type GTPase. The ability of RIT1 to promote  
331 downstream RAF/MEK/ERK signaling when aberrantly expressed suggests that RIT1 may not  
332 be subject to the same tight regulation by GTPase-activating proteins (GAPs) that normally  
333 keep RAS in an inactive state. Furthermore, these data raise the possibility that wild-type RIT1  
334 overexpression in *RIT1*-amplified cancers may contribute to tumorigenesis. *RIT1*, on  
335 chromosome 1q, is frequently amplified in uterine carcinosarcoma, liver hepatocellular cancer,  
336 cholangiocarcinoma, breast cancer, lung adenocarcinoma, and ovarian cancer. RIT1 mRNA  
337 expression is increased in amplified cases, regardless of tissue type, raising the possibility that  
338 RIT1 overexpression could play a role in tumorigenesis in these cancers.

339

340 We find that RIT1<sup>M90I</sup>, KRAS<sup>G12V</sup>, and KRAS<sup>Q61H</sup> share the ability to activate canonical RAS  
341 effector pathways PI3K/AKT and RAF/MEK. Likely as a consequence of RAF/MEK signaling to  
342 FOSL1, RIT1<sup>M90I</sup> also shares the ability to induce EMT markers including Vimentin, N-cadherin,  
343 and fibronectin. KRAS and RIT1 variants also shared the ability to profoundly suppress HLA-A, -  
344 B, and -C expression via a posttranscriptional mechanism. Taking advantage of differential  
345 expression of HLA proteins between RIT1<sup>WT</sup> and all other isogenic lines, we identified an entire  
346 Rab-mediated endocytic network that was lost together with HLA proteins in RIT1- and KRAS-  
347 mutant cells. This downregulated module also included PSMB9, a subunit of the  
348 immunoproteasome that is involved in antigen processing for class I MHC presentation. RAS  
349 oncogenes have long been recognized to suppress surface MHC expression<sup>48</sup>, in some cases  
350 transcriptionally and in others post-transcriptionally<sup>31</sup>. Our data link both oncogenic RIT1 and  
351 RAS to modulation of the processing and trafficking of MHC Class I molecules. Further  
352 identification of the mechanism of RIT1/RAS-mediated MHC suppression will provide a better  
353 understanding of tumor immune evasion which is critically needed to optimize patient  
354 stratification of cancer immunotherapy.

355  
356 In addition to the largely concordant regulation of proteins by mutant RIT1 and KRAS, we  
357 identified several unique phosphoproteins with differential abundance in RIT1<sup>M90I</sup> and KRAS-  
358 mutant cells. These included EGFR, a key oncoprotein in lung adenocarcinoma, which showed  
359 reduced phosphorylation of sites involved in receptor internalization and endocytic trafficking.  
360 Given the potent genetic interactions between KRAS and EGFR in lung cancer and colon  
361 cancer, it is attractive to speculate that feedback regulation of KRAS to EGFR could provide an  
362 explanatory mechanism for this phenomenon. Future work is needed to determine the basis of  
363 the specific regulation of EGFR phosphorylation by oncogenic KRAS but not RIT1.

364 Together, these results demonstrate the power of quantitative proteomics and transcriptomics to  
365 provide global views of cancer oncogene signaling. Our multi-omic analysis validated known  
366 consequences of RAS activation such as EMT and activation of RAF/MEK and PI3K signaling.  
367 For the first time, we gained a global view of RIT1 function, which confirmed its ability to  
368 stimulate canonical RAS signaling. However, phosphoproteomic profiling identified a number of  
369 key divergent mechanisms between KRAS- and RIT1-mutant cells, which point to the existence  
370 of novel, unique regulators or effectors of KRAS and RIT1 still to be identified. Future work is  
371 needed to investigate the mechanisms of these differences between KRAS and RIT1, the  
372 results of which will have important implications for cancer therapy and Noonan Syndrome.

373  
374

375  
376  
377



## 378 **Methods**

379

### 380 **Isogenic Cell Line Generation**

381 Plasmid constructs were cloned using Gateway Technology (Invitrogen/ThermoFisher) using  
382 pLX301 destination vector (Broad Institute) and pDONR223-RIT1 donor vectors previously  
383 described<sup>5</sup>. Lentivirus was generated by transfection of HEK293T cells with packaging and  
384 envelope vectors using standard protocols. AALE cells were a kind gift of Jesse Boehm (Broad  
385 Institute). Isogenic cells were generated by transduction of lentivirus generated from pLX317-  
386 Renilla luciferase or pLX301-RIT1<sup>WT</sup>, pLX301-RIT1<sup>M90I</sup>, pLX301-KRAS<sup>WT</sup>, pLX301-KRAS<sup>G12V</sup>, or  
387 pLX301-KRAS<sup>Q61H</sup> and selection with puromycin. Stable pools of cells were maintained in small  
388 airway growth medium (Lonza).

389

### 390 **Soft Agar Assay**

391  $1 \times 10^5$  cells were suspended in 1 ml of 0.33% select agar in small airway growth medium without  
392 EGF (Lonza) and plated on a bottom layer of 0.5% select agar in the same media in six-well  
393 dishes. Each cell line was analyzed in triplicate. Colonies were photographed after 14–21 days  
394 and quantified using CellProfiler<sup>49</sup>.

395

### 396 **Transcriptome profiling**

397 Three technical replicates per cell line were harvested at ~90% confluence (n = 18 total dishes).  
398 Cells were lysed and total RNA was extracted using Direct-zol RNA Miniprep plus (Zymo  
399 Research). Libraries were constructed using the non-strand-specific poly-A selection Illumina  
400 TruSeq kit for 50bp paired-end reads. Libraries were then pooled and sequenced on the  
401 Illumina NovaSeq platform (Fred Hutch Genomics Core). Reads were aligned to the human  
402 reference genome build hg19/GRCh37 using STAR v.2.5.3a<sup>50</sup>. Alignments were annotated for  
403 duplicates and read groups, and then reordered and indexed, using Picard Tools v.1.114<sup>51</sup>.

404 Read statistics for each RNA-seq sample were calculated using RSeQC<sup>52</sup>. Quantification of  
405 gene transcripts was performed by the featureCounts program within the Subread package<sup>53</sup>,  
406 using hg19 gene annotation from UCSC Gene level CPM and RPKM values were calculated  
407 with edgeR v.3.22.3<sup>54</sup>, and converted into transcripts per million (TPM values with an in-house  
408 script. In total, 12,887 genes were identified with average logCPM at least 0.1 across all  
409 samples. Differential expression analyses comparing KRAS or RIT1 perturbed cell lines against  
410 vector control lines were performed using edgeR<sup>54</sup>.

411

#### 412 **High performance liquid chromatography tandem mass spectrometry (LC-MS/MS)**

413 Cells were washed in ice-cold PBS, scraped into PBS, pelleted, and snap frozen in liquid  
414 nitrogen. The experimental workflow for sample processing, TMT-labeling, peptide enrichment,  
415 and LC-MS/MS were largely as previously described<sup>55</sup>. Briefly, pellets were lysed in 200  $\mu$ l of  
416 chilled urea lysis buffer (8 M urea, 75 mM NaCl, 50 mM Tris (pH 8.0), 1 mM EDTA, 2  $\mu$ g/ml  
417 aprotinin, 10  $\mu$ g/ml leupeptin, 1 mM PMSF, 1:100 (vol/vol) Phosphatase Inhibitor Cocktail 2,  
418 1:100 Phosphatase Inhibitor Cocktail 3, 10 mM NaF, and 20  $\mu$ M PUGNAc) for each ~50 mg  
419 portion of wet-weight tissue. Lysates were reduced with 5mM DTT, alkylated with 10 mM IAM,  
420 and digestion performed in solution with 1 mAU LysC per 50  $\mu$ g of total protein and trypsin at an  
421 enzyme/substrate ratio of 1:49. Reactions were quenched with FA and brought to pH = 3 with  
422 FA. Peptides were desalted on 200 mg tC18 SepPak cartridges and dried by vacuum  
423 centrifugation. 340  $\mu$ g of peptides were labeled with 10-plex Tandem Mass Tag reagents  
424 (TMT10, Fisher Scientific), according to manufacturer's instructions. To enable quantification of  
425 peptides across all 12 samples, the samples were labeled in sets of 10 across two different  
426 TMT10 pools in a crossover design with 8 of 12 samples analyzed in both TMT10 pools. A  
427 50/50 mix of both AALE vector control lysates was used as an internal reference in both TMT10  
428 runs (**Supplementary Fig. 1b**).

429

430 Each TMT10-plex was desalted in a 200 mg tC18 SepPak cartridge and fractionated using  
431 offline HPLC. 5% of each fraction was collected into an HPLC vial for proteome analysis by LC-  
432 MS/MS. The remaining 95% was processed for phospho-peptide enrichment via immobilized  
433 metal affinity chromatography (IMAC). IMAC enrichment was performed using Ni-NTA  
434 Superflow Agarose beads incubated with peptides solubilized in a final concentration of 80%  
435 MeCN/0.1% TFA. Phospho-enriched peptides were desalted and collected into an HPLC vial for  
436 analysis by LC-MS/MS.

437

438 Online fractionation was performed using a nanoflow Proxeon EASY-nLC 1200 UHPLC system  
439 (Thermo Fisher Scientific) and separated peptides were analyzed on a benchtop Orbitrap Q  
440 Exactive Plus mass spectrometer (Thermo Fisher Scientific) equipped with a nanoflow  
441 ionization source (James A. Hill Instrument Services, Arlington, MA). In-house packed columns  
442 (20 cm x 75  $\mu$ m diameter C18 silica picofrit capillary column; 1.9  $\mu$ m Reprosil-Pur C18-AQ  
443 beads, Dr. Maisch GmbH, r119.aq; Picofrit 10  $\mu$ m tip opening, New Objective, PF360-75-10-N-  
444 5). Mobile phase flow rate was 200 nL/min, comprised of 3 % acetonitrile/0.1 % formic acid  
445 (Solvent A) and 90 % acetonitrile /0.1 % formic acid (Solvent B). The 110 min LC-MS/MS  
446 method consisted of a 10 min column-equilibration procedure; a 20 min sample-loading  
447 procedure; and the following gradient profile: (min: % B) 0:2; 2:6; 85:30; 94:60; 95:90; 100:90;  
448 101:50; 110:50 (the last two steps at 500 nL/min flow rate). Data-dependent acquisition was  
449 performed using Xcalibur QExactive v2.4 software in positive ion mode at a spray voltage of  
450 2.00 kV. MS1 Spectra were measured with a resolution of 70,000, an AGC target of 3e6 and a  
451 mass range from 300 to 1800 m/z. Up to 12 MS/MS spectra per duty cycle were triggered at a  
452 resolution of 35,000, an AGC target of 5e4, an isolation window of 0.7 m/z, a maximum ion time  
453 of 120 msec, and normalized collision energy of 30. Peptides that triggered MS/MS scans were

454 dynamically excluded from further MS/MS scans for 20 sec. Charge state screening was  
455 enabled to reject precursor charge states that were unassigned, 1, or >6. Peptide match was  
456 set to preferred for monoisotopic precursor mass assignment.

457

#### 458 **Protein-peptide identification, phosphosite localization, and quantification**

459 MS data was interpreted using the Spectrum Mill software package v6.0 pre-release (Agilent  
460 Technologies, Santa Clara, CA. MS/MS spectra were merged if they were acquired within +/- 45  
461 sec of each other with the same precursor m/z. Also, MS/MS spectra that did not have a  
462 sequence tag length > 0 (i.e., minimum of two masses separated by the in chain mass of an  
463 amino acid) or did not have a precursor MH<sup>+</sup> in the range of 750-6000 were excluded from  
464 searching. MS/MS spectra searches were performed against a concatenated UniProt human  
465 reference proteome sequence database containing 58,929 human proteins including isoforms  
466 (obtained 10/17/2014) and 150 additional common laboratory contaminants. ESI-QEXACTIVE-  
467 HCD-3 scoring parameters were used for both whole proteome and phosphoproteome datasets.  
468 Spectra were allowed +/- 20 ppm mass tolerance for precursor as well as product ions, 30%  
469 minimum matched peak intensity, and “trypsin allow P” was set as enzyme specificity with up to  
470 4 missed cleavages allowed. Carbamidomethylation at cysteine was set as fixed modification  
471 together with TMT10 isobaric labels at lysine residues (N-termini would be considered  
472 regardless if it was TMT labelled). Acetylation of protein N-termini and oxidized methionine were  
473 set as variable modifications with a precursor MH<sup>+</sup> shift range of -18 to 64 Da for the proteome  
474 searches. For the phosphoproteome searches the precursor MH<sup>+</sup> shift range was set to 0 to  
475 272 Da and variable modifications of phosphorylation of serine, threonine, and tyrosine.  
476 Identities interpreted for individual spectra were automatically designated as confidently  
477 assigned using the Spectrum Mill autovalidation module to use target-decoy based false  
478 discovery rate (FDR) estimates to apply score threshold criteria. For the whole proteome

479 datasets, thresholding was done at the spectral (< 1.2%) and protein levels (< 0.1%) . For the  
480 phosphoproteome datasets, thresholding was done at the spectral (< 1.2%) and phosphosite  
481 levels (< 1.0%).

482 Replicates across TMT-plexes were highly correlated (**Supplementary Fig. 1c**) with median  
483 Pearson  $r = 0.87$  and  $0.69$  for proteome and phosphoproteome, respectively. Technical  
484 replicates and biological replicates were merged to generate final total proteome and phospho-  
485 proteome profiles for each isogenic cell line (**Supplementary Tables 1 and 2**). Replicate-level  
486 profiles are also supplied as JavaScript Object Notation (.json) files that can be visualized and  
487 analyzed using the Morpheus Matrix Visualization and Analysis Software at  
488 <https://software.broadinstitute.org/morpheus> (**Supplementary Files 1 and 2**). Differential  
489 protein and phospho-site signatures were generated by computing the mean  $\log_2$ (fold change)  
490 of the abundance of each site in each sample compared to the vector control cells. Statistical  
491 significance of differentially abundant proteins and phosphosites was determined by performing  
492 a one sample moderated t-test with multiple hypothesis correction (**Supplementary Tables 1**  
493 **and 2**).

494

### 495 **Integrative Analysis**

496 Correlation of changes in protein expression and changes in RNA expression was modeled  
497 using R's `lm()` function. 95% prediction intervals were calculated to determine genes with weak  
498 concordance between protein and RNA expression.

499

### 500 **Gene Set Enrichment Analysis**

501 Analysis of enrichment of KRAS signaling in differential RNA expression profiles was performed  
502 in R with the `goseq` package<sup>56</sup>. KRAS signaling gene sets were taken from MSigDB hallmark  
503 gene sets<sup>22,57</sup>.

504

### 505 **Transcription Factor Target Enrichment Analysis**

506 Analysis of over-representation of Transcription Factor targets was performed with ChEA3 by  
507 submitting lists of differentially expressed genes ( $|\text{LFC}| > 1$  and  $\text{FDR} < 0.05$ ). ChEA3 performs  
508 Fisher's Exact Test to compare the input gene set to TF target gene sets in six different  
509 libraries<sup>58</sup>. Analysis of the Enrichr Queries library was selected as the focus of the present  
510 study. Transcription factors resulting from this analysis were annotated as one of four groups of  
511 EMT association. These four groups were the Snail gene family, confirmed EMT genes defined  
512 by dbEMT<sup>59</sup>, genes shown to be associated with EMT in at least one study in literature, and  
513 genes unrelated to EMT.

514

### 515 **Antibodies and immunoblotting**

516 Antibodies against FOSL1 (D80B4), TXNIP (D5F3E), and Vimentin (D21H3) were purchased  
517 from Cell Signaling Technology. Vinculin (V9264) was purchased from Sigma Aldrich.  
518 Secondary antibodies StarBright Blue 700 Goat anti-Rabbit IgG, StarBright Blue 520 Goat anti-  
519 Rabbit IgG and StarBright Blue 520 Goat anti-Mouse IgG (12005867) were purchased from Bio-  
520 Rad. Antibody against RIT1 (#53720) was purchased from Abcam. Cell lysates were prepared  
521 in RTK lysis buffer with protease (11836153001, Roche) and phosphatase (04906837001,  
522 Roche) inhibitors added and quantified by the BCA assay (Thermo Scientific Waltham, MA).  
523 Samples were then boiled in Laemmli buffer (1610747, Bio-Rad, Hercules, CA) and 50 ug of  
524 protein was loaded onto 4-15% Mini-Protean TGX (4561084, Bio-Rad, Hercules, CA) gels.  
525 Protein gels were run and transferred to PVDF membranes (1704274, Bio-Rad, Hercules, CA)  
526 according to manufacturer's instructions. Proteins were detected by specific primary antibody  
527 and secondary antibody then visualized using the ChemiDoc MP Imaging System (Bio-Rad,  
528 Hercules, CA).

529

530

### 531 **KSEA analysis**

532 Kinase-substrate enrichment analysis (KSEA)<sup>60</sup> was performed using the KSEA App<sup>34</sup>  
533 (<https://casecpb.shinyapps.io/ksea/>) using kinase-substrate mappings from PhosphoSitePlus<sup>35</sup>  
534 and a p value threshold of < 0.05. A minimum of five detected phospho-site substrates were  
535 needed for kinases to be included in the analysis. The full list of kinase scores and number of  
536 substrates are shown in Supplementary Table 5. 36 kinases had sufficient substrate sites  
537 detected to be included in the analysis. Kinase-substrate mappings are shown in  
538 Supplementary Table 5.

539

### 540 **DATA AVAILABILITY**

541 The RNA-seq data have been deposited in the NCBI Gene Expression Omnibus database with  
542 accession number GSE146479. All mass spectra contributing to this study can be downloaded  
543 in the original instrument vendor format from the MassIVE online repository (Accession number  
544 to be updated prior to publication.)

545

### 546 **ACKNOWLEDGEMENTS**

547 We thank Drs. Athea Vichas and Jon Cooper (Fred Hutchinson Cancer Research Center) for  
548 advice, discussion, and critical reading of the manuscript. We thank Dr. D.R. Mani (Broad  
549 Institute) for guidance on statistical analysis. This research was funded in part through the  
550 National Cancer Institute (NCI) K99/R00 CA197762 to AHB, NIH/NCI Cancer Center Support  
551 Grant P30 CA015704, NCI Clinical Proteomic Tumor Analysis Consortium grants NIH/NCI U24-  
552 CA210986 and NIH/NCI U01 CA214125 to SAC. AL was supported in part by NSF IGERT  
553 DGE-1258485. KH was supported in part by PHS NRSA T32GM007270 from NIGMS.

554

555 **AUTHOR CONTRIBUTIONS**

556 A.H.B. conceived of and directed the study. S.C. and P.M. supervised the LC-MS/MS  
557 experiments. F.M. performed the proteomics data analysis, with contributions from  
558 A.H.B. and K.H. A.L. performed the transcriptome analysis. A.L. and A.H.B. wrote the  
559 manuscript. A.L., K.H., S.M., I.F., S.F., J.W., and A.H.B. performed experiments. All  
560 authors discussed results and provided input on the manuscript.

561

562

563

564



## 565 **Figure Legends**

### 566 **Figure 1. Comparative multi-omic profiling of KRAS- and RIT1-mutant human lung**

567 **epithelial cells. a**, Protein alignment of KRAS-4B (Uniprot #P01116-2) and RIT1 Isoform 1  
568 (Uniprot #Q92963-1) generated by ClustalW2<sup>61</sup>. Stars indicate the position of the RIT1<sup>M90I</sup> or  
569 KRAS<sup>G12V</sup> and KRAS<sup>Q61</sup> variants used in this study. Asterisks indicate fully conserved residues.  
570 Colons indicate strongly conserved residues. Periods indicate weakly conserved residues. **b**,  
571 Soft agar colony formation assay of isogenic AALE human lung epithelial cells. \*\*,  $p < 0.01$ ; \*\*\*\*,  
572  $p < 0.0001$  by two-tailed t-test. **c**, Western blot using anti-RAS and anti-RIT1 antibodies (top  
573 panels), or antibodies against phosphorylated ERK1/2 or vinculin (loading control). SE = short  
574 exposure, LE = long exposure. Isogenic AALE cells were cultured in the presence or absence of  
575 EGF for 12 hours. **d**, LC-MS/MS workflow for generation of proteome and phosphoproteome  
576 profiles. bRP, basic reverse phase chromatography. IMAC, immobilized metal affinity  
577 chromatography. **e**, Workflow for Illumina RNA-seq analysis. **f**, mRNA quantification in  
578 transcripts per million (TPM) showing mean  $\pm$  SD of RIT1 (left) or KRAS (right) in isogenic AALE  
579 cells,  $n = 3$  per cell line. \*,  $p < 0.05$ ; \*\*\*\*,  $p < 0.0001$  by two-tailed Student's t-test compared to  
580 vector control cells. **g**, RNA-seq quantification of variant allele expression. Data shown is the  
581 percentage of reads at the M90I, G12V, or Q61H variant site for the variant allele or wild-type  
582 allele.

### 583 **Figure 2. Quantitative proteome and transcriptome profiling identifies similarity in**

584 **RIT1<sup>M90I</sup>-mutant and KRAS-mutant signaling networks. a**, Volcano plots of global proteome  
585 data from isogenic AALE cells showing the  $\log_2$ (fold change) ("LFC") in protein abundance in  
586 each cell line compared to vector control cells. The y-axis displays the negative  $\log_{10}(p \text{ value})$   
587 calculated from a one sample moderated t-test with multiple hypothesis correction by the  
588 Benjamini-Hochberg method. **b**, Western blot validation of FOSL1 increased protein abundance  
589 in RIT1- and KRAS-mutant cells. The chart shows the LFC of FOSL1 as determined by LC-

590 MS/MS. Western blot below shows FOSL1 abundance or Vinculin (loading control). **c**, Western  
591 blot validation of TXNIP protein abundance in RIT1- and KRAS-mutant cells. The chart shows  
592 the LFC of TXNIP as determined by LC-MS/MS. **d**, Correlation heatmap showing pairwise  
593 Pearson and Spearman correlations of each proteome and phosphoproteome replicate to every  
594 other replicate. To enable correlation of proteome with phosphoproteome, phosphosites were  
595 collapsed to the protein level by taking the median of all phosphosites for each protein. **e**,  
596 Principal component analysis (PCA) of RNA-seq data. Circles correspond to control vector or  
597 wild-type replicates. Diamonds correspond to RIT1- or KRAS-mutant profiles.

598 **Figure 3. RIT1<sup>M90I</sup> promotes epithelial-to-mesenchymal (EMT) transition.** **a**, Gene set  
599 overlap analysis of up-regulated (“Up”; LFC>2) and down-regulated (“down”; LFC<-2) proteins  
600 using MSigDB Hallmark Pathways<sup>22</sup>. “K” and “R” indicate analysis based on mean LFC of  
601 KRAS<sup>G12V</sup>/KRAS<sup>Q61H</sup> cells or RIT1<sup>WT</sup>/RIT1<sup>M90I</sup> cells, respectively. Circle size corresponds to the *p*  
602 value of gene set overlap analysis determined by MSigDB. **b**, LFC of protein abundance of EMT  
603 marker genes as determined by LC-MS/MS, relative to vector control cells. **c**, Transcription  
604 factor target enrichment analysis of differentially expressed genes in RIT1<sup>M90I</sup>-mutant cells using  
605 Enrichr libraries. FET, Fisher’s exact test. Red = Snail family. Orange = confirmed EMT genes in  
606 dbEMT<sup>59</sup>. Pale orange = EMT-associated genes in literature. **d**, Enrichr analysis of KRAS<sup>G12V</sup>-  
607 mutant proteome data. Annotation is the same as in **c**.

608 **Figure 4. RIT1- and KRAS-mutant cells suppress Class I MHC expression via global loss**  
609 **of antigen processing and presenting machinery.** **a**, Rank plot of all protein abundance  
610 changes in KRAS<sup>G12V</sup>-mutant cells compared to vector control, generated by LC-MS/MS. HLA-  
611 A,-B,-C, and -F proteins are labeled in blue. **b**, Heat map showing HLA protein abundance in  
612 each global proteome replicate. Replicates were clustered by unsupervised hierarchical  
613 clustering using all detected proteins. **c**, Protein abundance of B2M in LC-MS/MS data. **d**, Top

614 differentially abundant proteins between RIT1<sup>WT</sup> cells and all other cell lines. Proteins are  
615 ranked by the signal-to-noise (S2N) statistic, shown in the bar chart at the right. **e**, StringDB<sup>62</sup>  
616 network analysis of proteins with S2N>2.5 in analysis shown in **d**. The network was significantly  
617 more connected than expected by chance ( $p < 1e-16$ ). Disconnected nodes, single connected  
618 nodes, and disconnected clusters have been removed from the visualization. Edges represent  
619 high confidence interaction scores (>0.9) and network edge thickness indicates the strength of  
620 data support from all StringDB active interaction sources. **f**, Protein abundance of PSMB9 in LC-  
621 MS/MS data. **g**, Global proteome-transcriptome correlation analysis. A dashed diagonal line  
622 displays the linear regression generated by comparing the LFC of each gene in the  
623 transcriptome to its respective protein LFC in the proteome. The resulting Pearson correlation  
624 coefficient ( $r$ ) is shown. Genes outside the 95% prediction interval are plotted in red, and include  
625 HLA genes, metallothioneins, and intermediate filament proteins Vimentin (VIM) and alpha  
626 internexin (INA).

627 **Figure 5. Phosphoproteomic profiling illuminates novel differential post-translational**  
628 **modifications in RIT1<sup>M90I</sup>- and KRAS-mutant cells.** **a**, KSEA analysis of AALE  
629 phosphoproteomes. Top differentially phosphorylated kinase substrates are shown. The full  
630 KSEA results are shown in **Supplementary Fig 4b-c**. **b**, Violin plot of phospho-site abundance  
631 of phospho-sites that are RPS6KA1 substrates. **c**, Violin plot of phospho-site abundance of  
632 phospho-sites that are MAPKAPK2 substrates. **d**, Marker selection analysis identifies  
633 differentially phosphorylated sites in KRAS-mutant cells compared to RIT1-mutant cells.  
634 Phosphosites from KRAS-mutant and RIT1<sup>M90I</sup>-mutant replicate-level phosphoproteome profiles  
635 (**Supplementary File 2**) were compared by two-tailed t-test. The top 20 significantly (FDR <  
636 0.05) differentially phosphorylated sites in each direction are shown and ranked by t-statistic. A  
637 heat map displays the LFC in phosphorylated peptide abundance of each site compared to  
638 vector control, after normalizing to total protein abundance. **e**, LFC of EGFR phosphosites in

639 KRAS-mutant and RIT1-mutant cells. Data shown is the mean + SD of n=8 KRAS-mutant  
640 replicates and n=4 RIT1-mutant replicates. \*, FDR < 0.01 as determined by two-tailed t-test and  
641 two-stage linear step-up procedure of Benjamini, Krieger and Yekutieli. **f**, Relative  
642 phosphorylation of USO1 at serine 48 as determined by LC-MS/MS. Box and whiskers show the  
643 25th-75th percentiles and minimum to maximum of the data, respectively. **g**, Relationship of  
644 USO1 S48 phosphorylation to KRAS total protein abundance. A dashed line displays the linear  
645 regression fit and gray lines display the 95% confidence interval of the linear model.  $r = 0.70$ ,  $p$   
646 < 0.01.

647

#### 648 **SUPPLEMENTARY FIGURE LEGENDS**

##### 649 **Supplementary Figure 1. Workflow and quality control of proteomic and transcriptomic**

650 **profiling. a**, Replicate-level workflow for tandem mass tag (TMT) labeling and LC-MS/MS.

651 Lysates from duplicate sets of six isogenic cell lines were used to generate two TMT-plex sets,  
652 with control samples used to link the two sets. **b**, TMT 10-plex layout showing mass tags  
653 associated with each replicate. **c**, Average pairwise replicate correlations (Pearson  $r$ ) of all  
654 replicates from each sample group indicated. **d**, Enrichment analysis of differentially expressed  
655 genes between KRAS or RIT1 perturbed lines and vector controls using *goseq*<sup>56</sup>. mSigDB  
656 hallmark gene sets specific to KRAS signaling are shown. **e**, RNA-seq run and mapping  
657 statistics show total reads, mapped reads, and reads mapped to rRNA, for each sample.

658

##### 659 **Supplementary Figure 2. RIT1 and KRAS promote epithelial-to-mesenchymal transition.**

660 **a**, Changes in mRNA transcript levels of EMT genes *VIM*, *CDH2*, *FN1*, and *KRT19*, in each  
661 isogenic cell line compared to vector control. LFC,  $\log_2$ (fold-change) compared to vector cells. **b**,  
662 Transcription factor target enrichment analysis using Enrichr libraries of differentially expressed  
663 genes in RIT1<sup>WT</sup>, KRAS<sup>WT</sup>, and KRAS<sup>Q61H</sup>-mutant cells. FET, Fisher's exact test. Red = Snail

664 family. Orange = confirmed EMT genes in dbEMT<sup>59</sup>. Pale orange = EMT-associated genes in  
665 literature.

666

667 **Supplementary Figure 3. Post-transcriptional loss of Class I MHC proteins.** **a**, Rank plot of  
668 all protein abundance changes in KRAS<sup>Q61H</sup>-mutant or RIT1<sup>M90I</sup>-mutant cells compared to vector  
669 control, generated by LC-MS/MS. HLA-A,-B,-C, and -F proteins are labeled. LFC, log<sub>2</sub> fold-  
670 change. **b**, Change in mRNA transcript levels of HLA genes and upstream regulators of MHC  
671 Class I, in each isogenic cell line compared to vector controls. LFC, log<sub>2</sub> fold change compared  
672 to vector cells. **c**, Correlation of protein levels in HLA-A and PSMB9 across each isogenic cell  
673 line. A line is the best-fit linear regression with significant non-zero slope ( $p < 0.05$ ).

674

675 **Supplementary Figure 4. Phosphoproteome profiling identifies enhanced**  
676 **phosphorylation of specific kinase substrates in KRAS- and RIT1-mutant cells.** **a**, Pairwise  
677 replicate correlation (Pearson  $r$ ) heatmap and unsupervised clustering of phosphoproteome  
678 data. **b**, KSEA of phosphoproteome data for RIT1<sup>WT</sup> and RIT1<sup>M90I</sup>-expressing cells. The kinase  
679 z-score indicates the overall score for each kinase listed, normalized by the total number of  
680 substrates. Significant scores ( $p < 0.05$ ) are indicated in red and blue. Phospho-sites of kinases  
681 in red were more highly abundant in the cell line compared to vector control, whereas phospho-  
682 sites of kinases in blue were more highly abundant in vector control than the indicated cell line.  
683 **c**, KSEA of phosphoproteome data for KRAS-expressing cells. Labeling as in **(b)**. **d**, Violin plot  
684 of phospho-site abundance of AKT1 substrate sites. **e**, Violin plot of phospho-site abundance of  
685 PRKCA substrate sites. **f**, Violin plot of phospho-site abundance of AURKB substrate sites. **g**,  
686 EGFR protein abundance in LC-MS/MS data compared to vector control. **f**, Proportion of  
687 phosphorylated sites in AHNAK proteins with differential phosphorylation between KRAS-mutant  
688 and RIT1<sup>M90I</sup>-mutant cells. Data shown is the percentage of differentially abundant

689 phosphorylation sites in AHNAK and AHNAK2 compared to all other sites. Significance was  
690 determined from the analysis in **(b)**, FDR < 0.05. \*\*\*\*,  $p < 0.0001$  by two-sided Fisher's exact  
691 test.  
692

## 693 **References**

694

- 695 1. Trahey, M. & McCormick, F. A cytoplasmic protein stimulates normal N-ras p21 GTPase,  
696 but does not affect oncogenic mutants. *Science* **238**, 542–545 (1987).
- 697 2. Emil F. Pai, Wolfgang Kabsch, Ute Krengel, Kenneth C. Holmes, Jacob John & Alfred  
698 Wittinghofer. Structure of the guanine-nucleotide-binding domain of the Ha-ras oncogene  
699 p21 in the triphosphate conformation. *Nature* **2**, 1105–1111 (1989).
- 700 3. Nakano, H. *et al.* Isolation of transforming sequences of two human lung carcinomas:  
701 structural and functional analysis of the activated c-K-ras oncogenes. *Proc. Natl. Acad. Sci.*  
702 *U. S. A.* **81**, 71–75 (1984).
- 703 4. Rodenhuis, S. *et al.* Mutational activation of the K-ras oncogene. A possible pathogenetic  
704 factor in adenocarcinoma of the lung. *N. Engl. J. Med.* **317**, 929–935 (1987).
- 705 5. Berger, A. H. *et al.* Oncogenic RIT1 mutations in lung adenocarcinoma. *Oncogene* **33**,  
706 4418–4423 (2014).
- 707 6. Gómez-Seguí, I. *et al.* Novel recurrent mutations in the RAS-like GTP-binding gene RIT1 in  
708 myeloid malignancies. *Leukemia* **27**, 1943–1946 (2013).
- 709 7. Aoki, Y. *et al.* Gain-of-Function Mutations in RIT1 Cause Noonan Syndrome, a RAS/MAPK  
710 Pathway Syndrome. *Am. J. Hum. Genet.* **93**, 173–180 (2013).
- 711 8. Cai, W. *et al.* Rit GTPase signaling promotes immature hippocampal neuronal survival. *J.*  
712 *Neurosci.* **32**, 9887–9897 (2012).
- 713 9. Rusyn, E. V. *et al.* Rit, a non-lipid-modified Ras-related protein, transforms NIH3T3 cells  
714 without activating the ERK, JNK, p38 MAPK or PI3K/Akt pathways. *Oncogene* **19**, 4685–  
715 4694 (2000).
- 716 10. Sakabe, K. *et al.* Potent transforming activity of the small GTP-binding protein Rit in NIH  
717 3T3 cells: evidence for a role of a p38gamma-dependent signaling pathway. *FEBS Lett.*  
718 **511**, 15–20 (2002).

- 719 11. Castel, P. *et al.* RIT1 oncoproteins escape LZTR1-mediated proteolysis. *Science* **363**,  
720 1226–1230 (2019).
- 721 12. Fang, Z. *et al.* Biochemical Classification of Disease-associated Mutants of RAS-like  
722 Protein Expressed in Many Tissues (RIT1). *J. Biol. Chem.* **291**, 15641–15652 (2016).
- 723 13. Lundberg, A. S. *et al.* Immortalization and transformation of primary human airway epithelial  
724 cells by gene transfer. *Oncogene* **21**, 4577–4586 (2002).
- 725 14. Simanshu, D. K., Nissley, D. V. & McCormick, F. RAS Proteins and Their Regulators in  
726 Human Disease. *Cell* **170**, 17–33 (2017).
- 727 15. Young, M. R. & Colburn, N. H. Fra-1 a target for cancer prevention or intervention. *Gene*  
728 **379**, 1–11 (2006).
- 729 16. Mechta, F., Lallemand, D., Pfarr, C. M. & Yaniv, M. Transformation by ras modifies AP1  
730 composition and activity. *Oncogene* **14**, 837–847 (1997).
- 731 17. Casalino, L., De Cesare, D. & Verde, P. Accumulation of Fra-1 in ras-transformed cells  
732 depends on both transcriptional autoregulation and MEK-dependent posttranslational  
733 stabilization. *Mol. Cell. Biol.* **23**, 4401–4415 (2003).
- 734 18. Yoshihara, E. *et al.* Thioredoxin/Txnip: redoxosome, as a redox switch for the pathogenesis  
735 of diseases. *Front. Immunol.* **4**, 514 (2014).
- 736 19. Parikh, H. *et al.* TXNIP regulates peripheral glucose metabolism in humans. *PLoS Med.* **4**,  
737 e158 (2007).
- 738 20. Elgort, M. G., O’Shea, J. M., Jiang, Y. & Ayer, D. E. Transcriptional and Translational  
739 Downregulation of Thioredoxin Interacting Protein Is Required for Metabolic  
740 Reprogramming during G(1). *Genes Cancer* **1**, 893–907 (2010).
- 741 21. Ye, Z. & Ayer, D. E. Ras Suppresses TXNIP Expression by Restricting Ribosome  
742 Translocation. *Mol. Cell. Biol.* **38**, (2018).
- 743 22. Liberzon, A. *et al.* The Molecular Signatures Database (MSigDB) hallmark gene set



- 744 collection. *Cell Syst* **1**, 417–425 (2015).
- 745 23. Ye, X. & Weinberg, R. A. Epithelial-Mesenchymal Plasticity: A Central Regulator of Cancer  
746 Progression. *Trends Cell Biol.* **25**, 675–686 (2015).
- 747 24. Singh, A. *et al.* A gene expression signature associated with ‘K-Ras addiction’ reveals  
748 regulators of EMT and tumor cell survival. *Cancer Cell* **15**, 489–500 (2009).
- 749 25. Shao, D. D. *et al.* KRAS and YAP1 converge to regulate EMT and tumor survival. *Cell* **158**,  
750 171–184 (2014).
- 751 26. Shukla, S. A. *et al.* Comprehensive analysis of cancer-associated somatic mutations in  
752 class I HLA genes. *Nat. Biotechnol.* **33**, 1152–1158 (2015).
- 753 27. Conway, J. R., Kofman, E., Mo, S. S., Elmarakeby, H. & Van Allen, E. Genomics of  
754 response to immune checkpoint therapies for cancer: implications for precision medicine.  
755 *Genome Med.* **10**, 93 (2018).
- 756 28. Gettinger, S. *et al.* Impaired HLA Class I Antigen Processing and Presentation as a  
757 Mechanism of Acquired Resistance to Immune Checkpoint Inhibitors in Lung Cancer.  
758 *Cancer Discov.* **7**, 1420–1435 (2017).
- 759 29. Jongsma, M. L. M., Guarda, G. & Spaapen, R. M. The regulatory network behind MHC  
760 class I expression. *Mol. Immunol.* **113**, 16–21 (2019).
- 761 30. Burr, M. L. *et al.* An Evolutionarily Conserved Function of Polycomb Silences the MHC  
762 Class I Antigen Presentation Pathway and Enables Immune Evasion in Cancer. *Cancer*  
763 *Cell* **36**, 385–401.e8 (2019).
- 764 31. Seliger, B. *et al.* Down-regulation of the MHC class I antigen-processing machinery after  
765 oncogenic transformation of murine fibroblasts. *Eur. J. Immunol.* **28**, 122–133 (1998).
- 766 32. Roux, P. P. *et al.* RAS/ERK signaling promotes site-specific ribosomal protein S6  
767 phosphorylation via RSK and stimulates cap-dependent translation. *J. Biol. Chem.* **282**,  
768 14056–14064 (2007).

- 769 33. Mendoza, M. C., Er, E. E. & Blenis, J. The Ras-ERK and PI3K-mTOR pathways: cross-talk  
770 and compensation. *Trends Biochem. Sci.* **36**, 320–328 (2011).
- 771 34. Wiredja, D. D., Koyutürk, M. & Chance, M. R. The KSEA App: a web-based tool for kinase  
772 activity inference from quantitative phosphoproteomics. *Bioinformatics* (2017)  
773 doi:10.1093/bioinformatics/btx415.
- 774 35. Hornbeck, P. V. *et al.* PhosphoSitePlus: a comprehensive resource for investigating the  
775 structure and function of experimentally determined post-translational modifications in man  
776 and mouse. *Nucleic Acids Res.* **40**, D261–D270 (2011).
- 777 36. Linding, R. *et al.* Systematic discovery of in vivo phosphorylation networks. *Cell* **129**, 1415–  
778 1426 (2007).
- 779 37. Unni, A. M., Lockwood, W. W., Zejnullahu, K., Lee-Lin, S.-Q. & Varmus, H. Evidence that  
780 synthetic lethality underlies the mutual exclusivity of oncogenic KRAS and EGFR mutations  
781 in lung adenocarcinoma. *Elife* **4**, e06907 (2015).
- 782 38. Chang, C. P. *et al.* Ligand-induced internalization of the epidermal growth factor receptor is  
783 mediated by multiple endocytic codes analogous to the tyrosine motif found in constitutively  
784 internalized receptors. *J. Biol. Chem.* **268**, 19312–19320 (1993).
- 785 39. Tong, J., Taylor, P., Peterman, S. M., Prakash, A. & Moran, M. F. Epidermal growth factor  
786 receptor phosphorylation sites Ser991 and Tyr998 are implicated in the regulation of  
787 receptor endocytosis and phosphorylations at Ser1039 and Thr1041. *Mol. Cell. Proteomics*  
788 **8**, 2131–2144 (2009).
- 789 40. Yu, I.-M. & Hughson, F. M. Tethering factors as organizers of intracellular vesicular traffic.  
790 *Annu. Rev. Cell Dev. Biol.* **26**, 137–156 (2010).
- 791 41. Prior, I. A. & Hancock, J. F. Ras trafficking, localization and compartmentalized signalling.  
792 *Semin. Cell Dev. Biol.* **23**, 145–153 (2012).
- 793 42. Shao, H., Kadono-Okuda, K., Finlin, B. S. & Andres, D. A. Biochemical characterization of

- 794 the Ras-related GTPases Rit and Rin. *Arch. Biochem. Biophys.* **371**, 207–219 (1999).
- 795 43. Park, J. W. *et al.* AHNAK Loss in Mice Promotes Type II Pneumocyte Hyperplasia and  
796 Lung Tumor Development. *Mol. Cancer Res.* **16**, 1287–1298 (2018).
- 797 44. Lee, I. H. *et al.* Ahnak functions as a tumor suppressor via modulation of TGF $\beta$ /Smad  
798 signaling pathway. *Oncogene* **33**, 4675–4684 (2014).
- 799 45. Che, Y. *et al.* KRAS regulation by small non-coding RNAs and SNARE proteins. *Nat.*  
800 *Commun.* **10**, 5118 (2019).
- 801 46. Ritchie, C. *et al.* Analysis of K-Ras Interactions by Biotin Ligase Tagging. *Cancer Genomics*  
802 *Proteomics* **14**, 225–239 (2017).
- 803 47. Ambrogio, C. *et al.* KRAS Dimerization Impacts MEK Inhibitor Sensitivity and Oncogenic  
804 Activity of Mutant KRAS. *Cell* **172**, 857–868.e15 (2018).
- 805 48. Pylayeva-Gupta, Y., Grabocka, E. & Bar-Sagi, D. RAS oncogenes: weaving a tumorigenic  
806 web. *Nat. Rev. Cancer* **11**, 761–774 (2011).
- 807 49. Carpenter, A. E. *et al.* CellProfiler: image analysis software for identifying and quantifying  
808 cell phenotypes. *Genome Biol.* **7**, R100 (2006).
- 809 50. Dobin, A. *et al.* STAR: ultrafast universal RNA-seq aligner. *Bioinformatics* **29**, 15–21 (2013).
- 810 51. Picard Tools - By Broad Institute. <http://broadinstitute.github.io/picard>.
- 811 52. Wang, L., Wang, S. & Li, W. RSeQC: quality control of RNA-seq experiments.  
812 *Bioinformatics* **28**, 2184–2185 (2012).
- 813 53. Liao, Y., Smyth, G. K. & Shi, W. FeatureCounts: An efficient general purpose program for  
814 assigning sequence reads to genomic features. *Bioinformatics* **30**, 923–930 (2014).
- 815 54. Robinson, M. D., McCarthy, D. J. & Smyth, G. K. edgeR: A Bioconductor package for  
816 differential expression analysis of digital gene expression data. *Bioinformatics* **26**, 139–140  
817 (2009).
- 818 55. Mertins, P. *et al.* Reproducible workflow for multiplexed deep-scale proteome and

- 819 phosphoproteome analysis of tumor tissues by liquid chromatography-mass spectrometry.  
820 *Nat. Protoc.* **13**, 1632–1661 (2018).
- 821 56. Young, M. D., Wakefield, M. J., Smyth, G. K. & Oshlack, A. Gene ontology analysis for  
822 RNA-seq: accounting for selection bias. *Genome Biol.* **11**, R14 (2010).
- 823 57. Subramanian, A. *et al.* Gene set enrichment analysis: a knowledge-based approach for  
824 interpreting genome-wide expression profiles. *Proc. Natl. Acad. Sci. U. S. A.* **102**, 15545–  
825 15550 (2005).
- 826 58. Keenan, A. B. *et al.* ChEA3: transcription factor enrichment analysis by orthogonal omics  
827 integration. *Nucleic Acids Res.* **47**, W212–W224 (2019).
- 828 59. Zhao, M., Liu, Y., Zheng, C. & Qu, H. dbEMT 2.0: An updated database for epithelial-  
829 mesenchymal transition genes with experimentally verified information and precalculated  
830 regulation information for cancer metastasis. *J. Genet. Genomics* **46**, 595–597 (2019).
- 831 60. Casado, P. *et al.* Kinase-substrate enrichment analysis provides insights into the  
832 heterogeneity of signaling pathway activation in leukemia cells. *Sci. Signal.* **6**, rs6 (2013).
- 833 61. Larkin, M. A. *et al.* Clustal W and Clustal X version 2.0. *Bioinformatics* **23**, 2947–2948  
834 (2007).
- 835 62. Szklarczyk, D. *et al.* STRING v10: protein-protein interaction networks, integrated over the  
836 tree of life. *Nucleic Acids Res.* **43**, D447–52 (2015).

837  
838  
839  
840  
841  
842  
843  
844

**a**

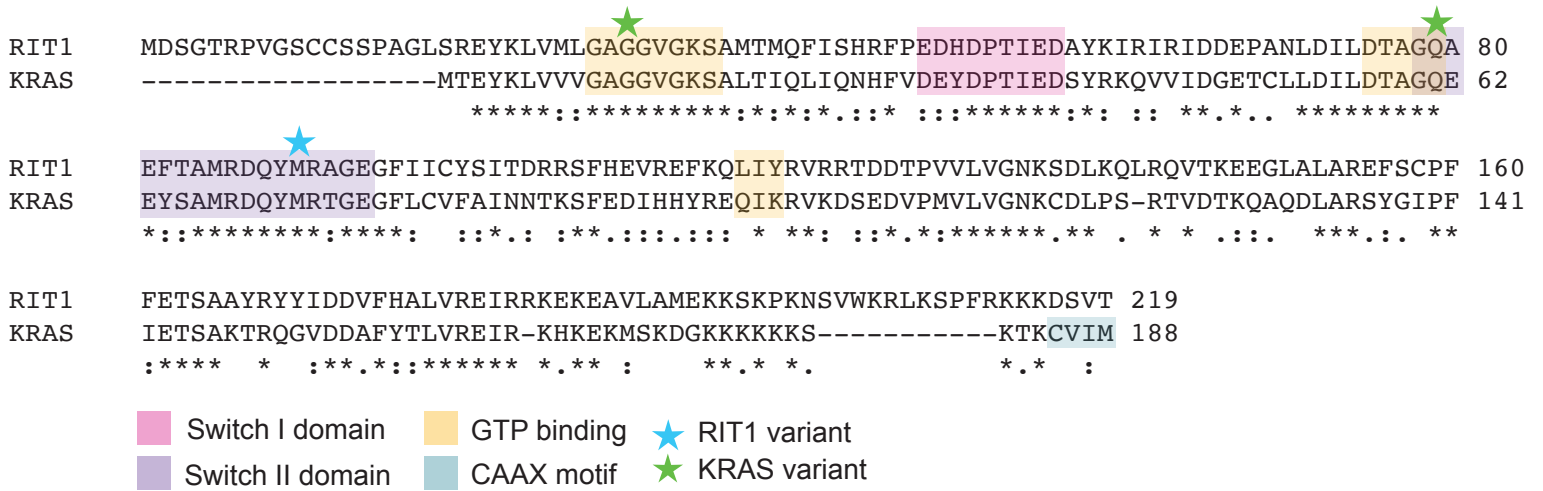

**b**

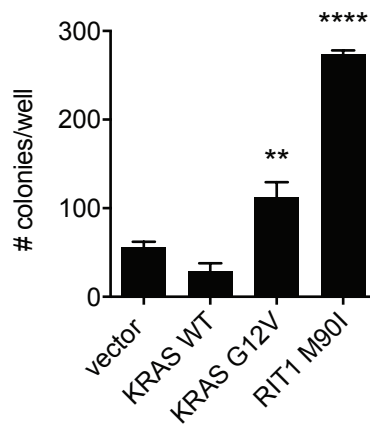

**c**

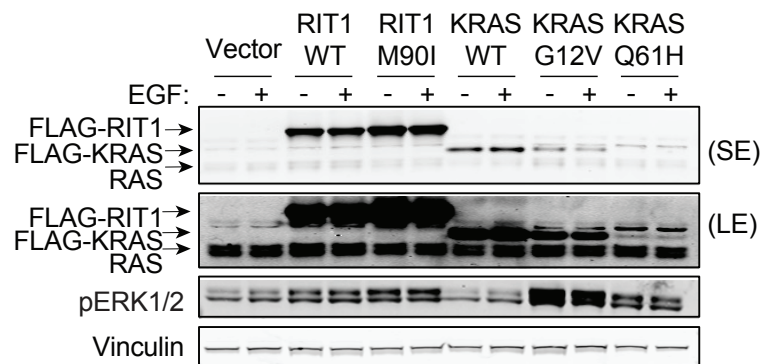

**d**

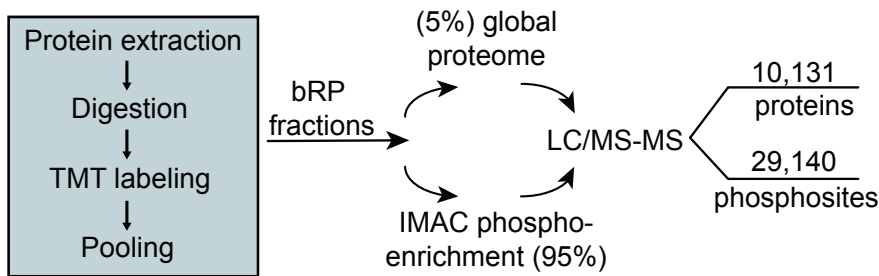

**e**

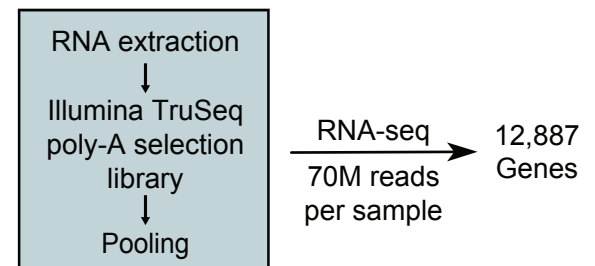

**f**

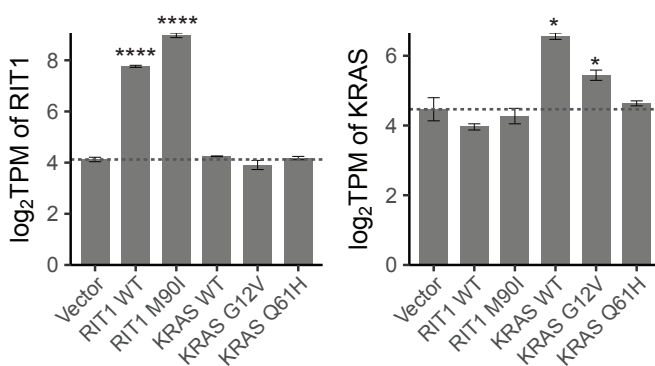

**g**

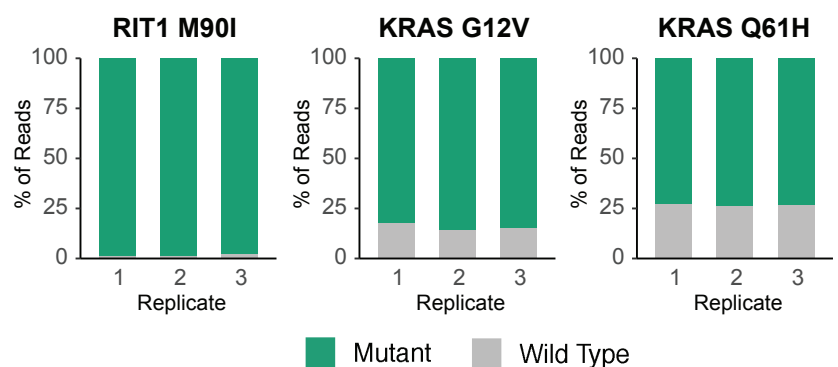

**a**

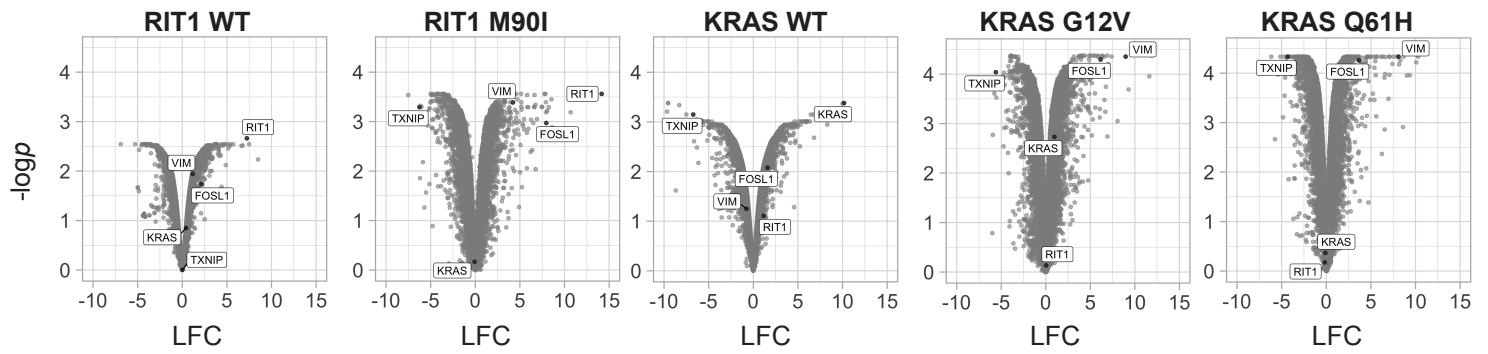

**b**

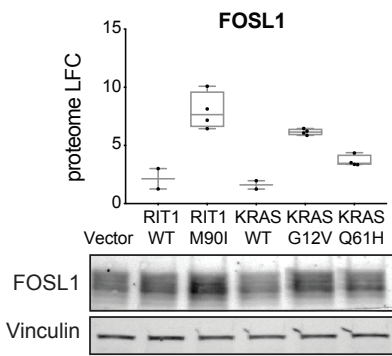

**c**

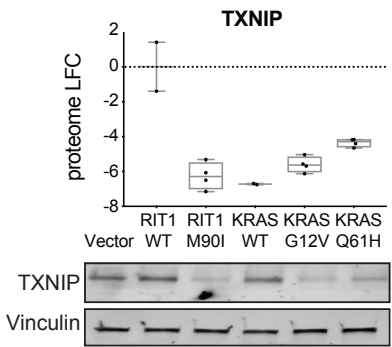

**e**

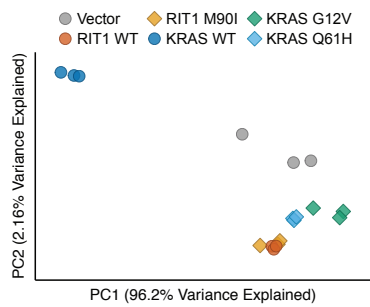

**d**

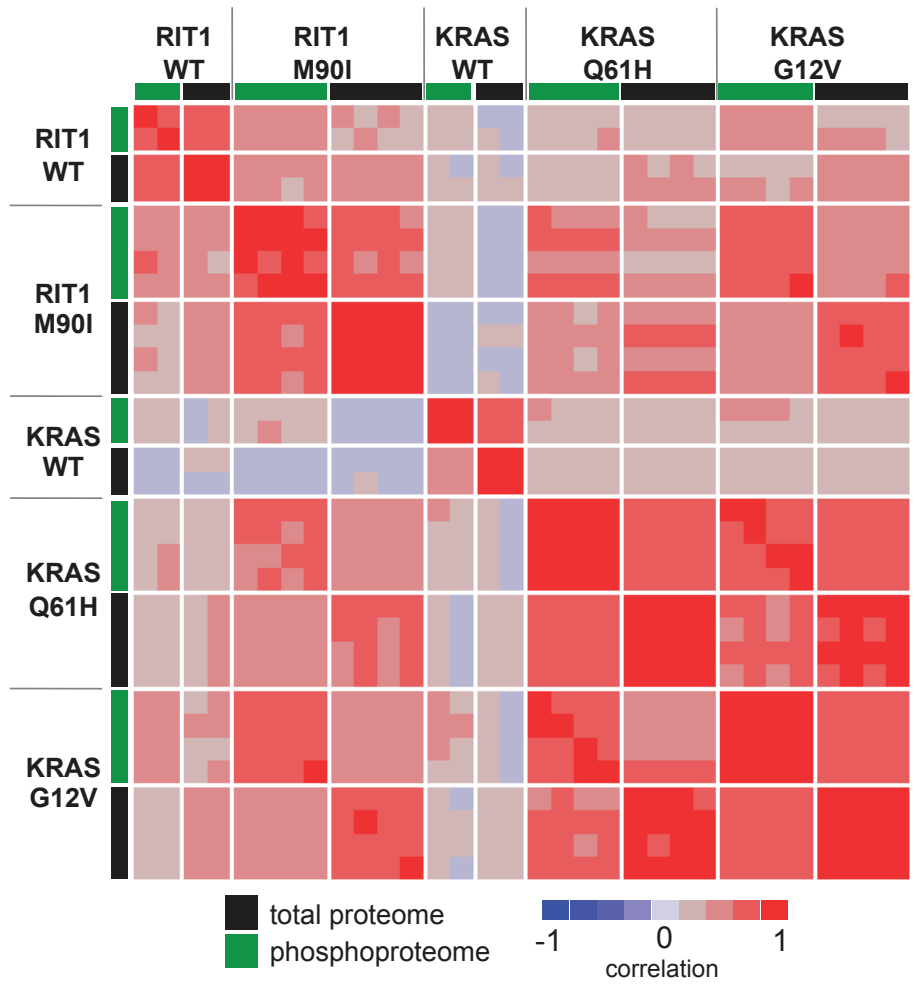

**a**

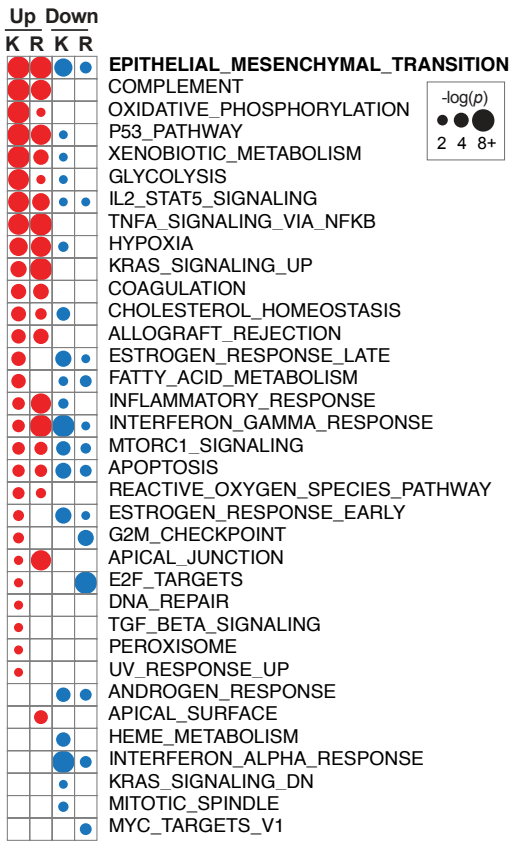

**b**

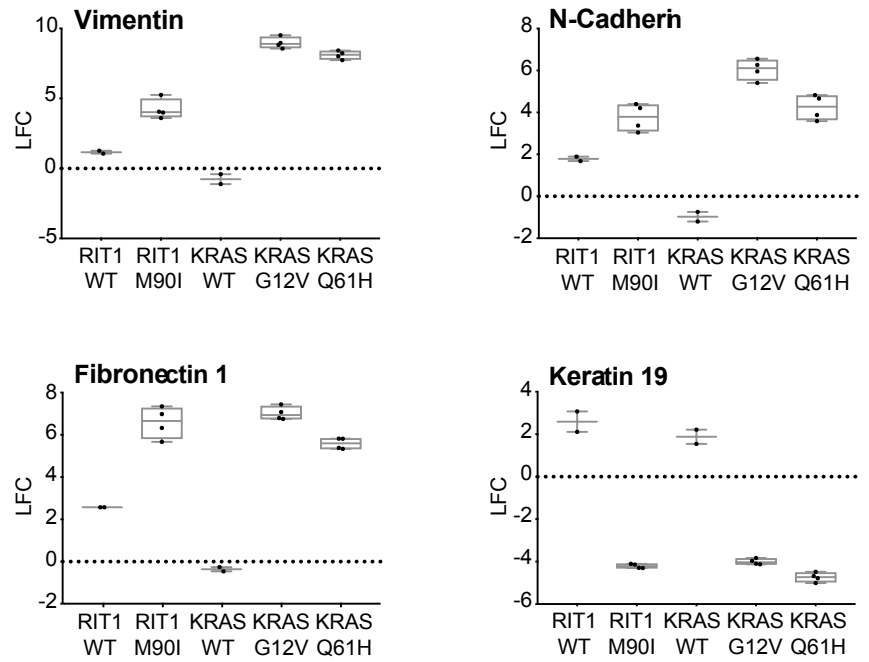

**c**

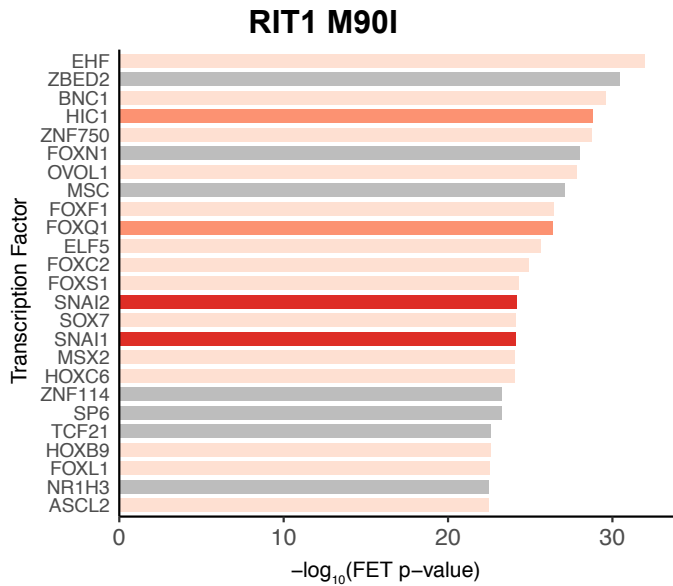

**d**

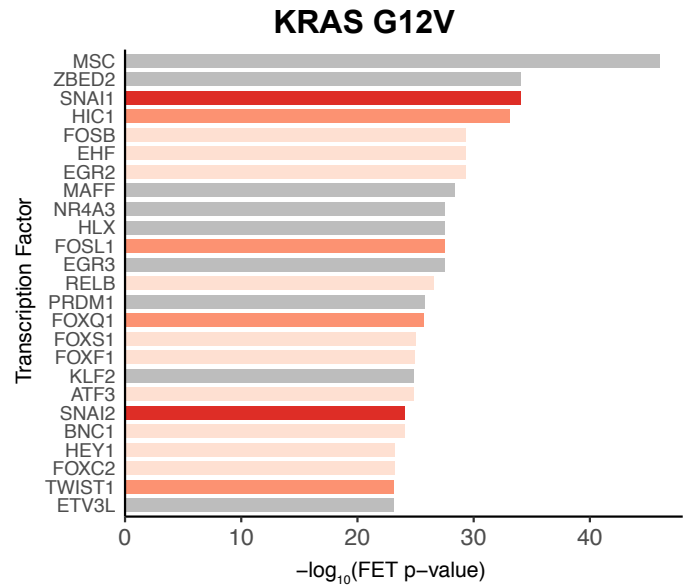

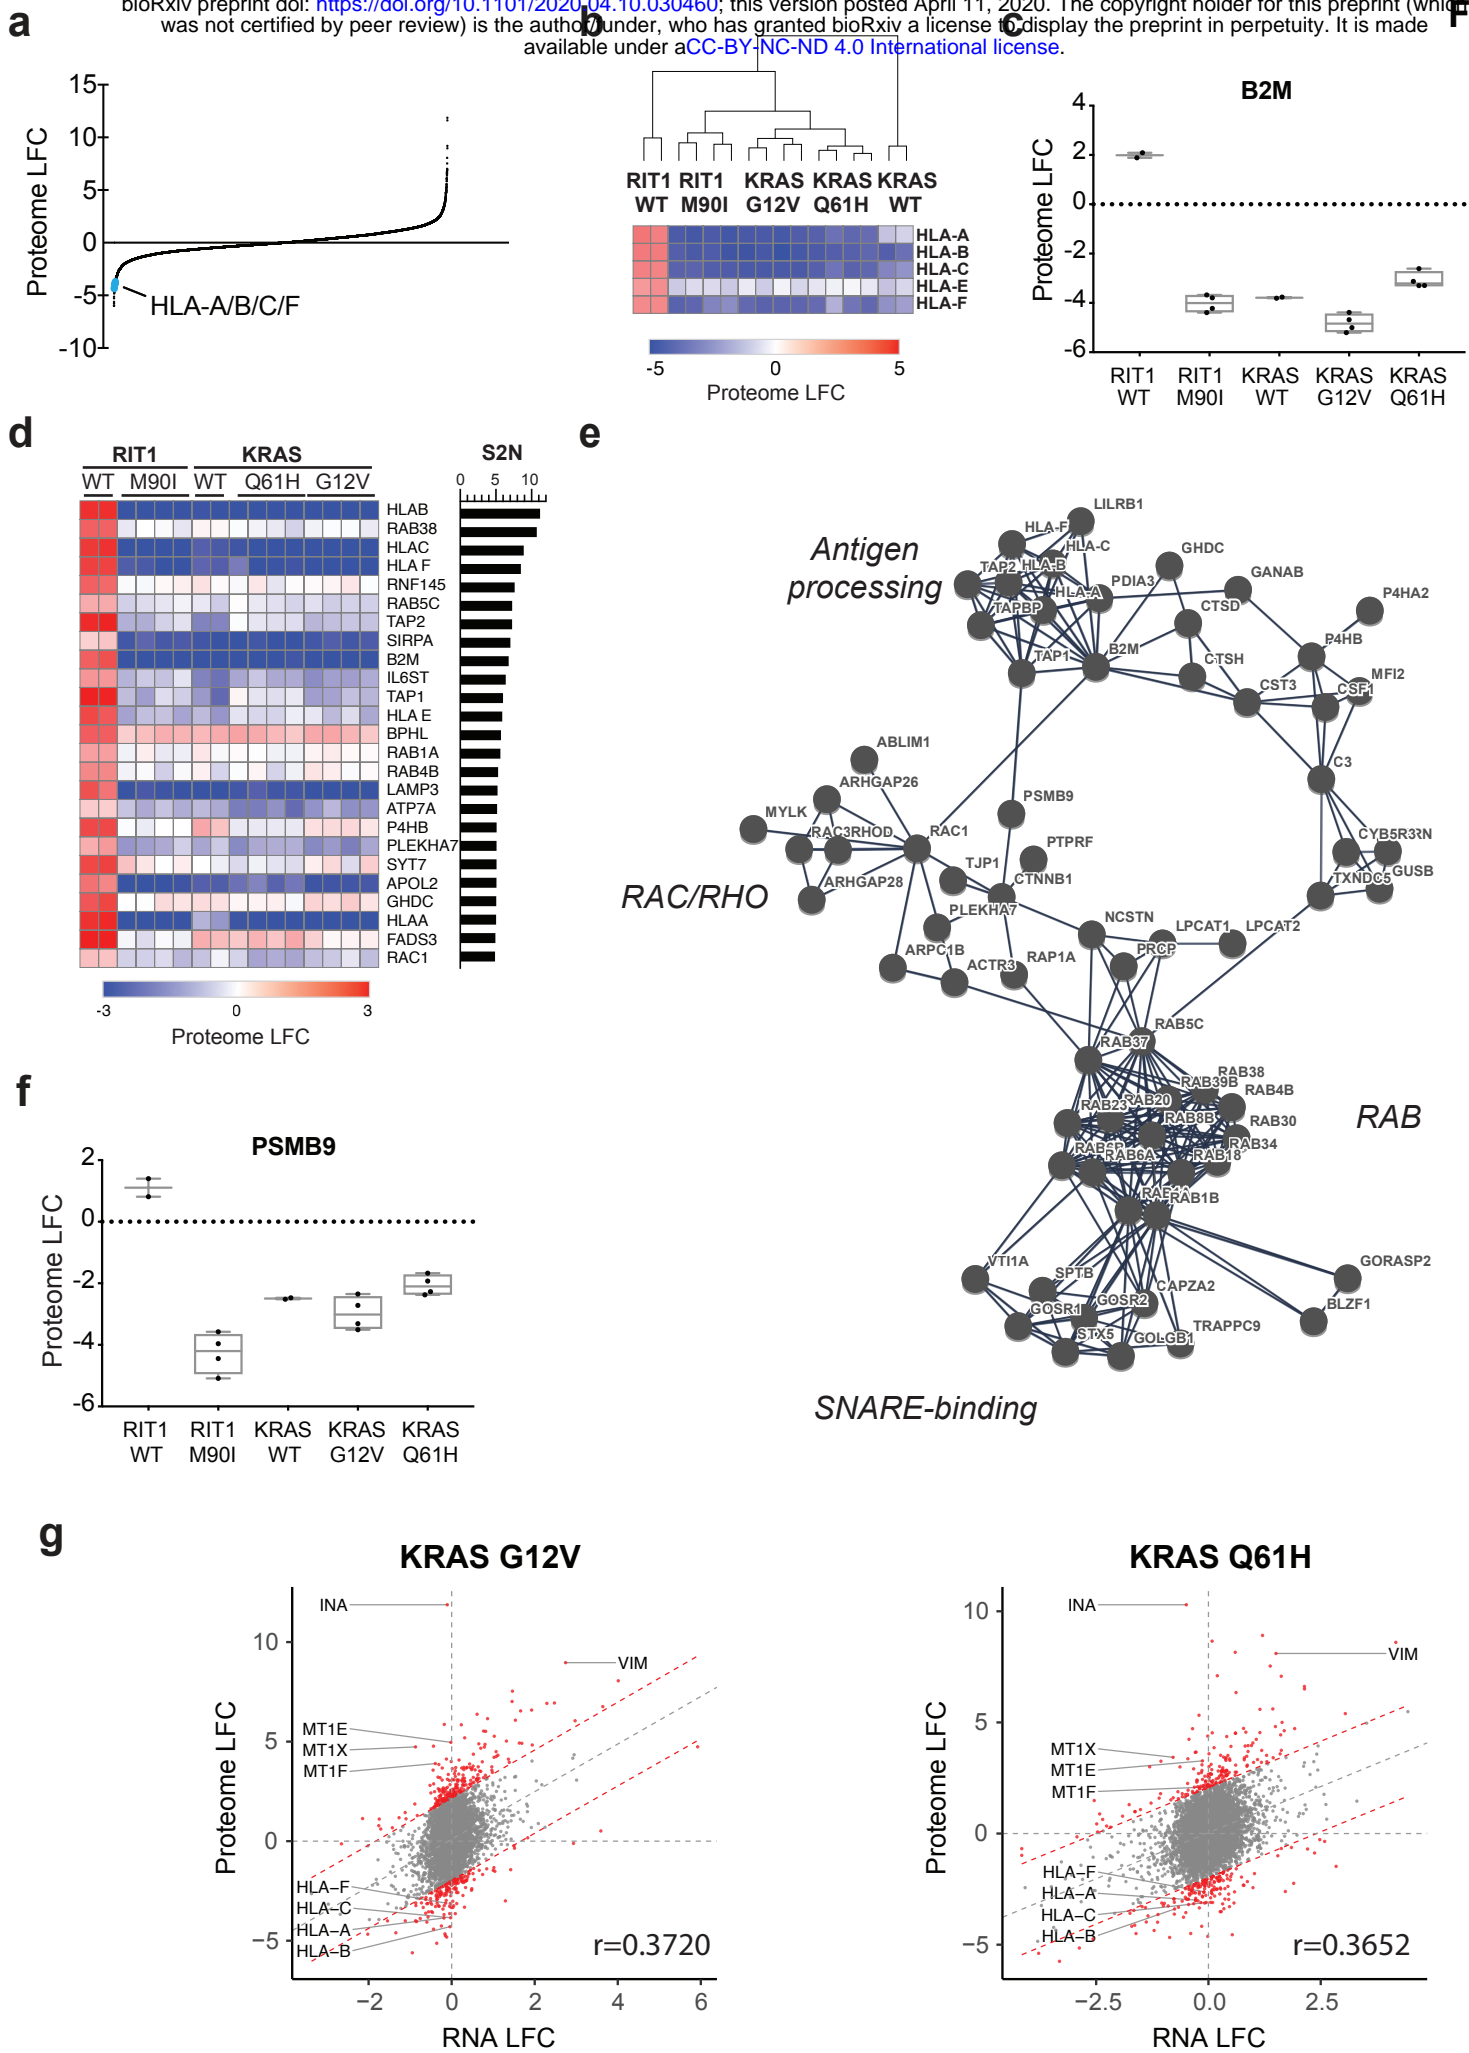



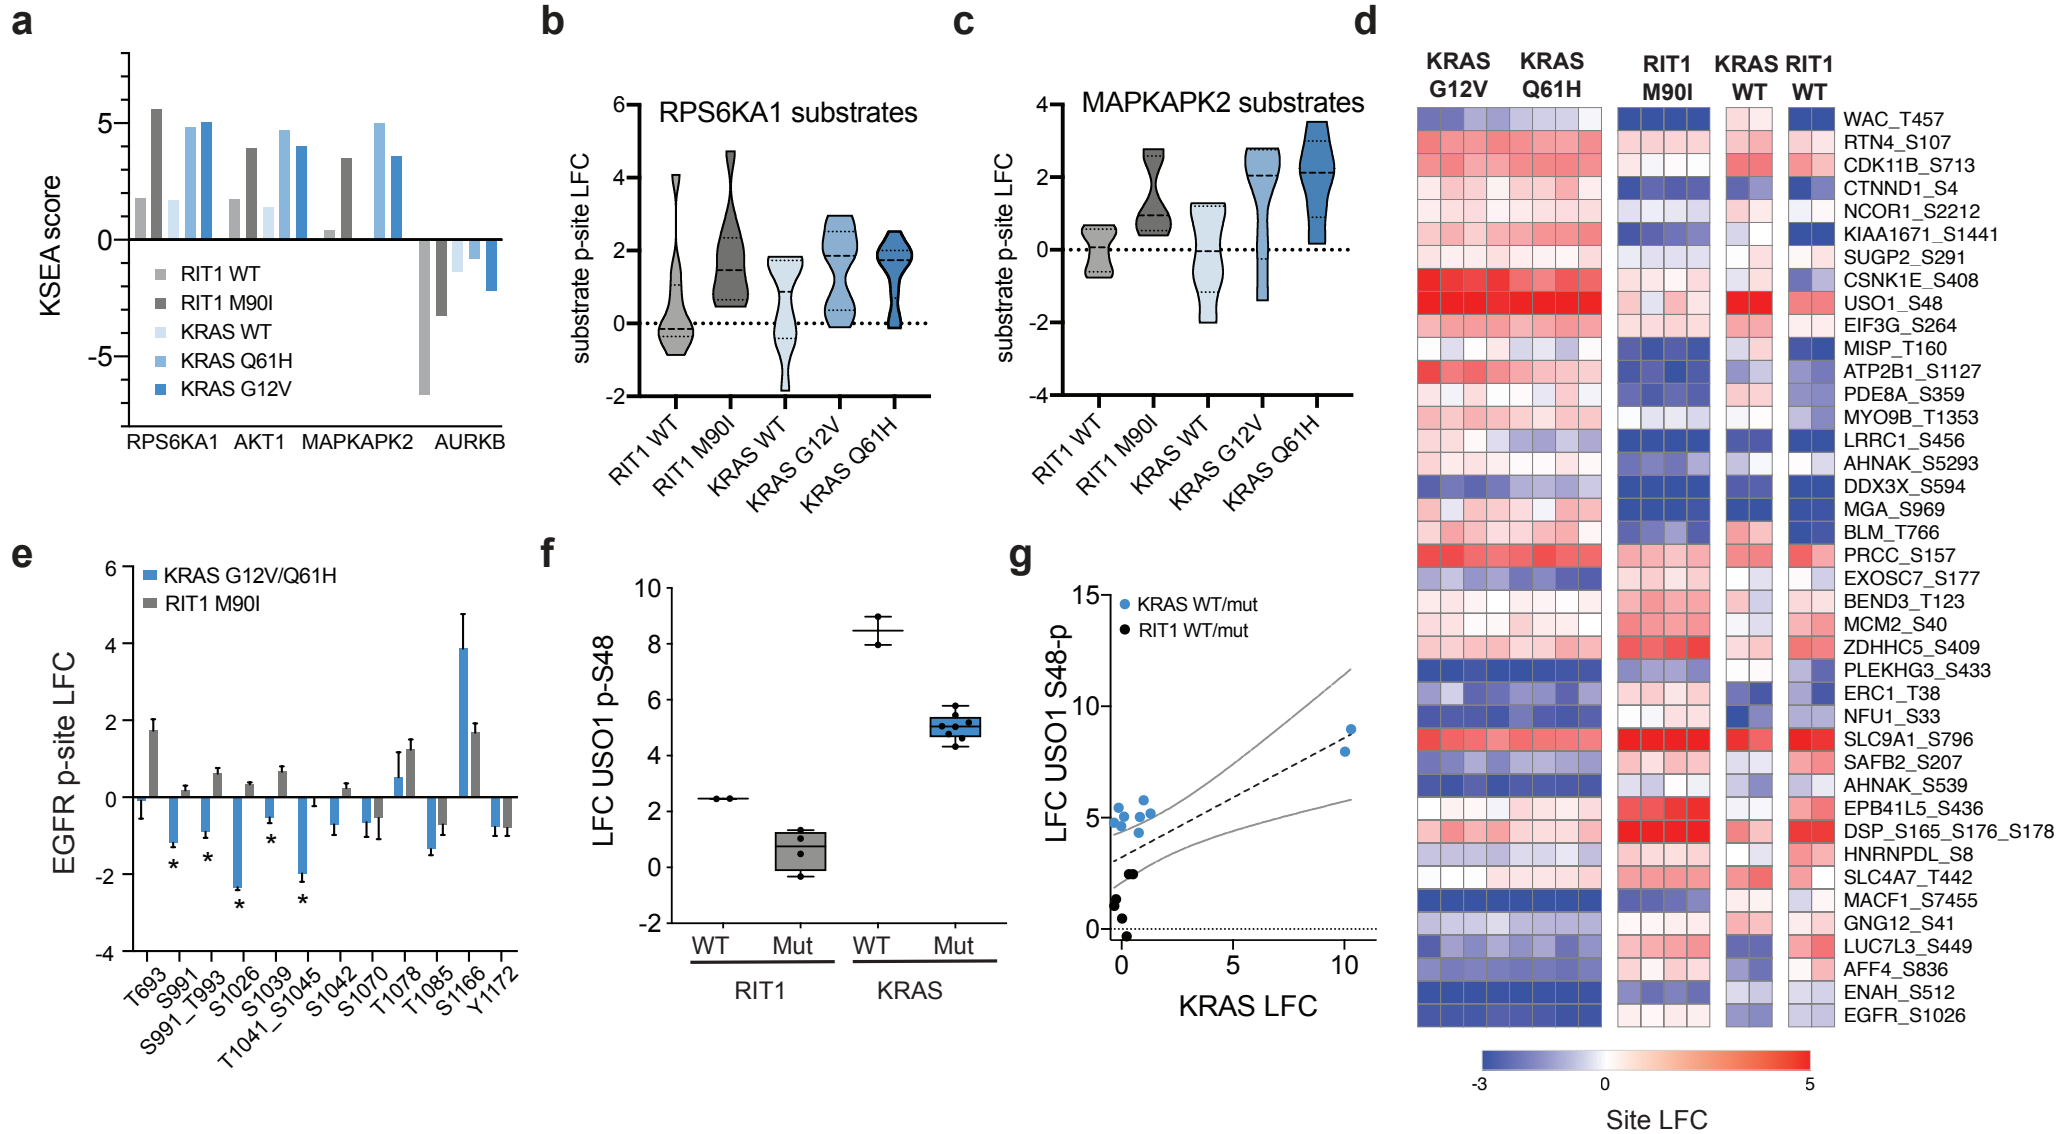

Source: https://www.biorxiv.org/content/10.1101/2020.04.10.030460v1.full.pdf
