# Supplementary material for: Mapping the unique and shared functions of oncogenic KRAS and RIT1 with proteome and transcriptome profiling
Source: bioRxiv or medRxiv preprint supplement (doi:10.1101/2020.04.10.030460), 2020-04-11

a

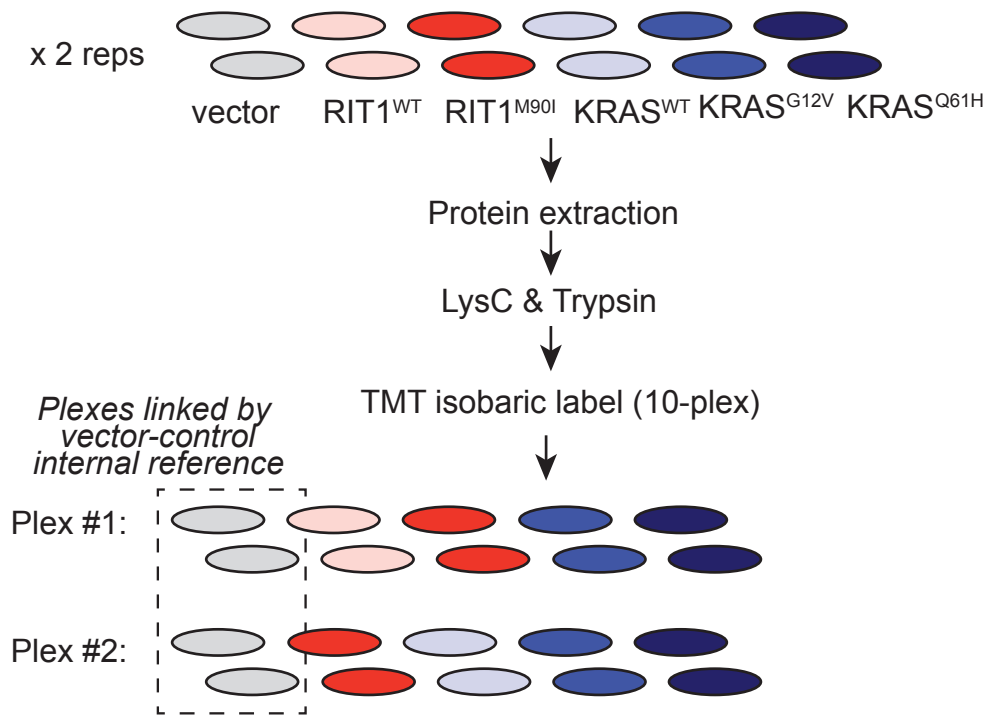

d

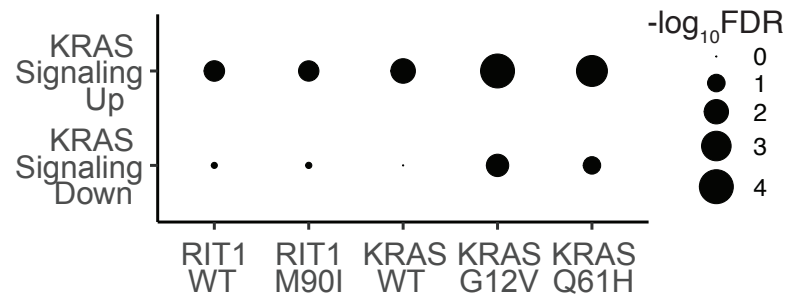

b

| Experiment 1    | TMT Tag | Experiment 2    | TMT Tag |
|-----------------|---------|-----------------|---------|
| KRAS G12V Rep 1 | 126     | KRAS G12V Rep 1 | 126     |
| RIT1 WT Rep 2   | 131     | RIT1 M90I Rep 1 | 131     |
| RIT1 M90I Rep 2 | 127C    | KRAS Q61H Rep 2 | 127C    |
| KRAS Q61H Rep 2 | 127N    | KRAS Q61H Rep 1 | 127N    |
| Vector Rep 1    | 128C    | KRAS WT Rep 2   | 128C    |
| KRAS G12V Rep 2 | 128N    | KRAS WT Rep 1   | 128N    |
| RIT1 M90I Rep 1 | 129C    | Vector Rep 1    | 129C    |
| RIT1 WT Rep 1   | 129N    | RIT1 M90I Rep 2 | 129N    |
| KRAS Q61H Rep 1 | 130C    | KRAS G12V Rep 2 | 130C    |
| Vector Rep 2    | 130N    | Vector Rep 2    | 130N    |

c

| Replicate set | Proteome | Phospho-proteome |
|---------------|----------|------------------|
| RIT1 WT       | 0.84     | 0.60             |
| RIT1 M90I     | 0.83     | 0.69             |
| KRAS WT       | 0.90     | 0.77             |
| KRAS G12V     | 0.87     | 0.69             |
| KRAS Q61H     | 0.91     | 0.72             |

e

| Group     | Sample      | Total Reads | Mapped Reads | rRNA Reads |
|-----------|-------------|-------------|--------------|------------|
| KRAS-G12V | KRAS-G12V_1 | 265969454   | 102506440    | 1413908    |
| KRAS-G12V | KRAS-G12V_2 | 236719962   | 63365494     | 1239580    |
| KRAS-G12V | KRAS-G12V_3 | 246633574   | 77975208     | 1684446    |
| KRAS-Q61H | KRAS-Q61H_1 | 230047062   | 75117724     | 2306602    |
| KRAS-Q61H | KRAS-Q61H_2 | 212706418   | 67632558     | 1454868    |
| KRAS-Q61H | KRAS-Q61H_3 | 212464086   | 80122798     | 719300     |
| KRAS-WT   | KRAS-WT_1   | 215832806   | 75204614     | 1927496    |
| KRAS-WT   | KRAS-WT_2   | 114503272   | 54598020     | 915628     |
| KRAS-WT   | KRAS-WT_3   | 275145008   | 86902056     | 1710894    |
| Vector    | Vector_1    | 208952294   | 77102730     | 1373232    |
| Vector    | Vector_2    | 250094672   | 79498920     | 2074506    |
| Vector    | Vector_3    | 188129714   | 55042564     | 1131944    |
| RIT1-M90I | RIT1-M90I_1 | 219121344   | 53220806     | 2628260    |
| RIT1-M90I | RIT1-M90I_2 | 228132502   | 67300612     | 2385516    |
| RIT1-M90I | RIT1-M90I_3 | 180861518   | 34480460     | 1295320    |
| RIT1-WT   | RIT1-WT_1   | 223601164   | 59893560     | 1913980    |
| RIT1-WT   | RIT1-WT_2   | 254163922   | 72581670     | 1783556    |
| RIT1-WT   | RIT1-WT_3   | 211397706   | 63770336     | 1824880    |

**a**

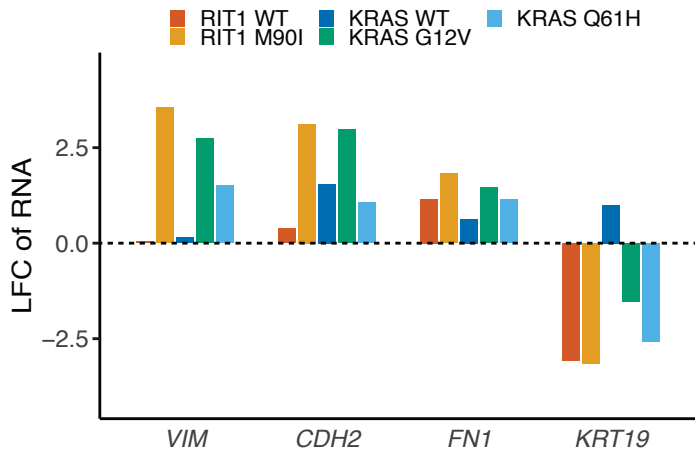

**b**

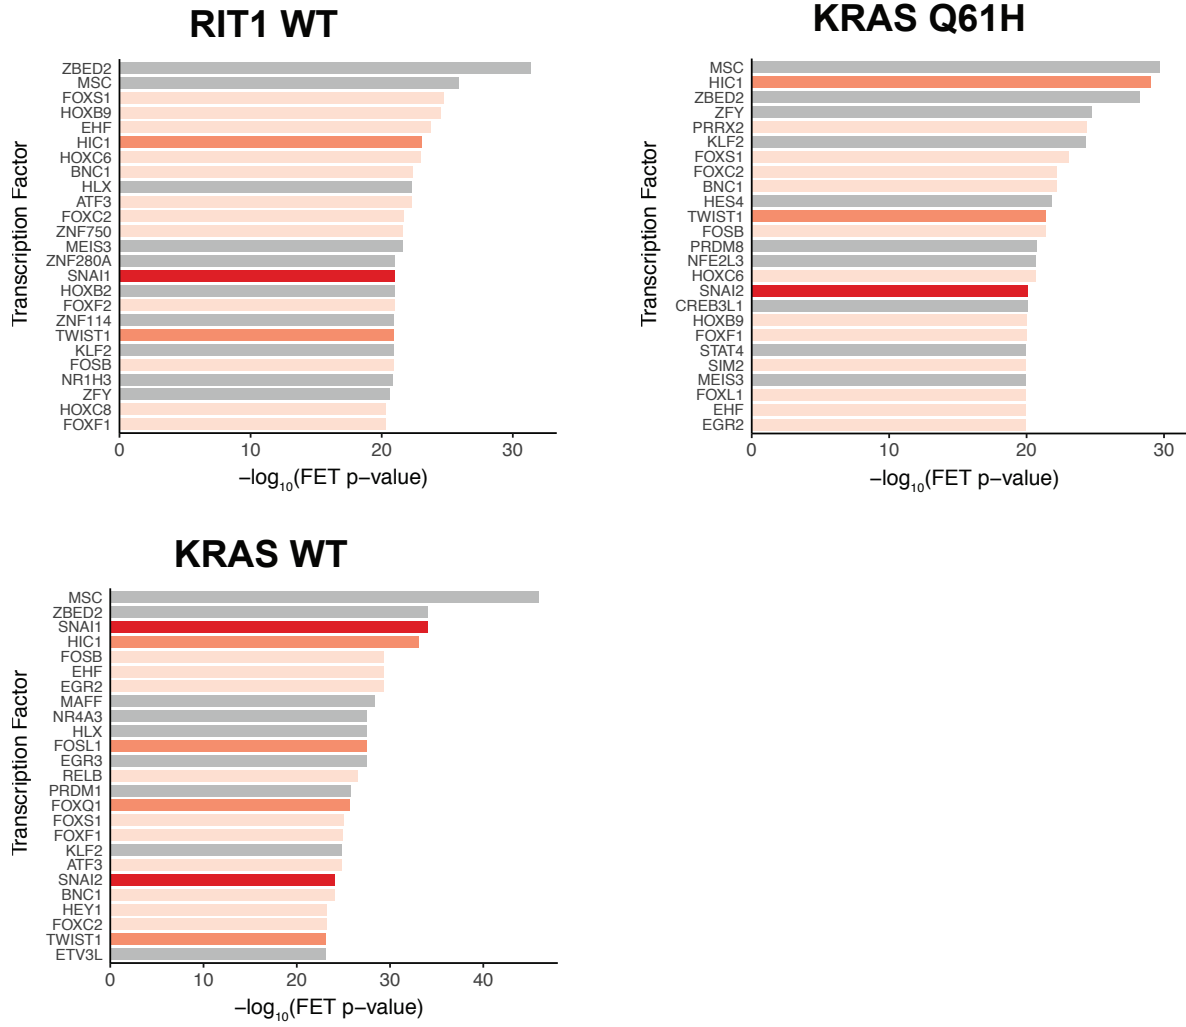

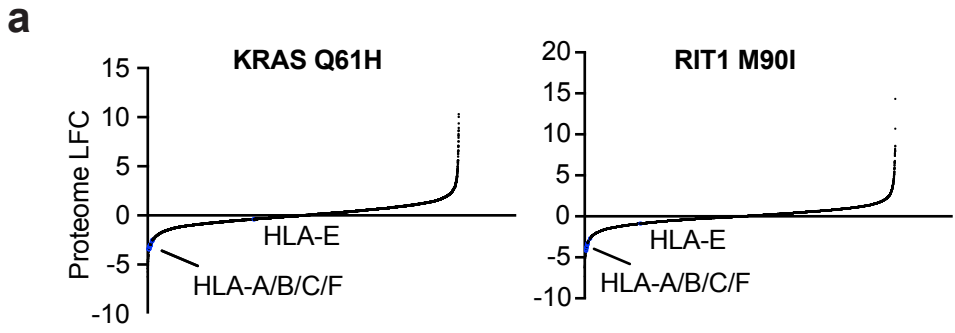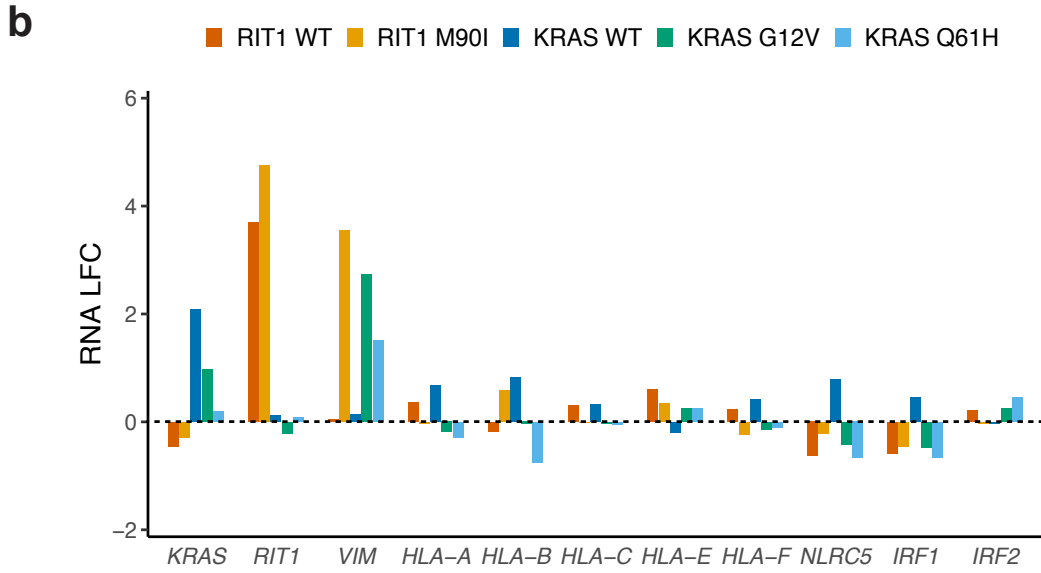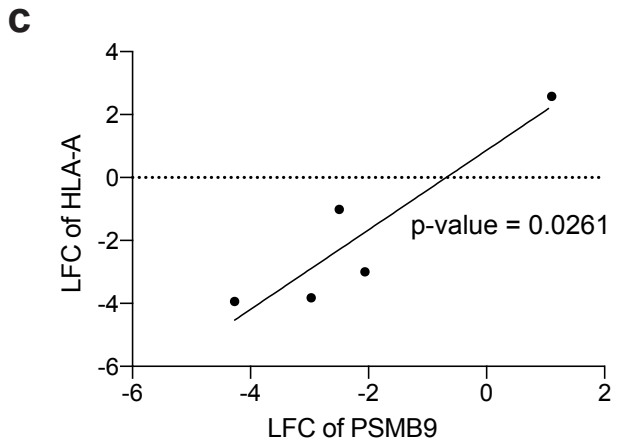

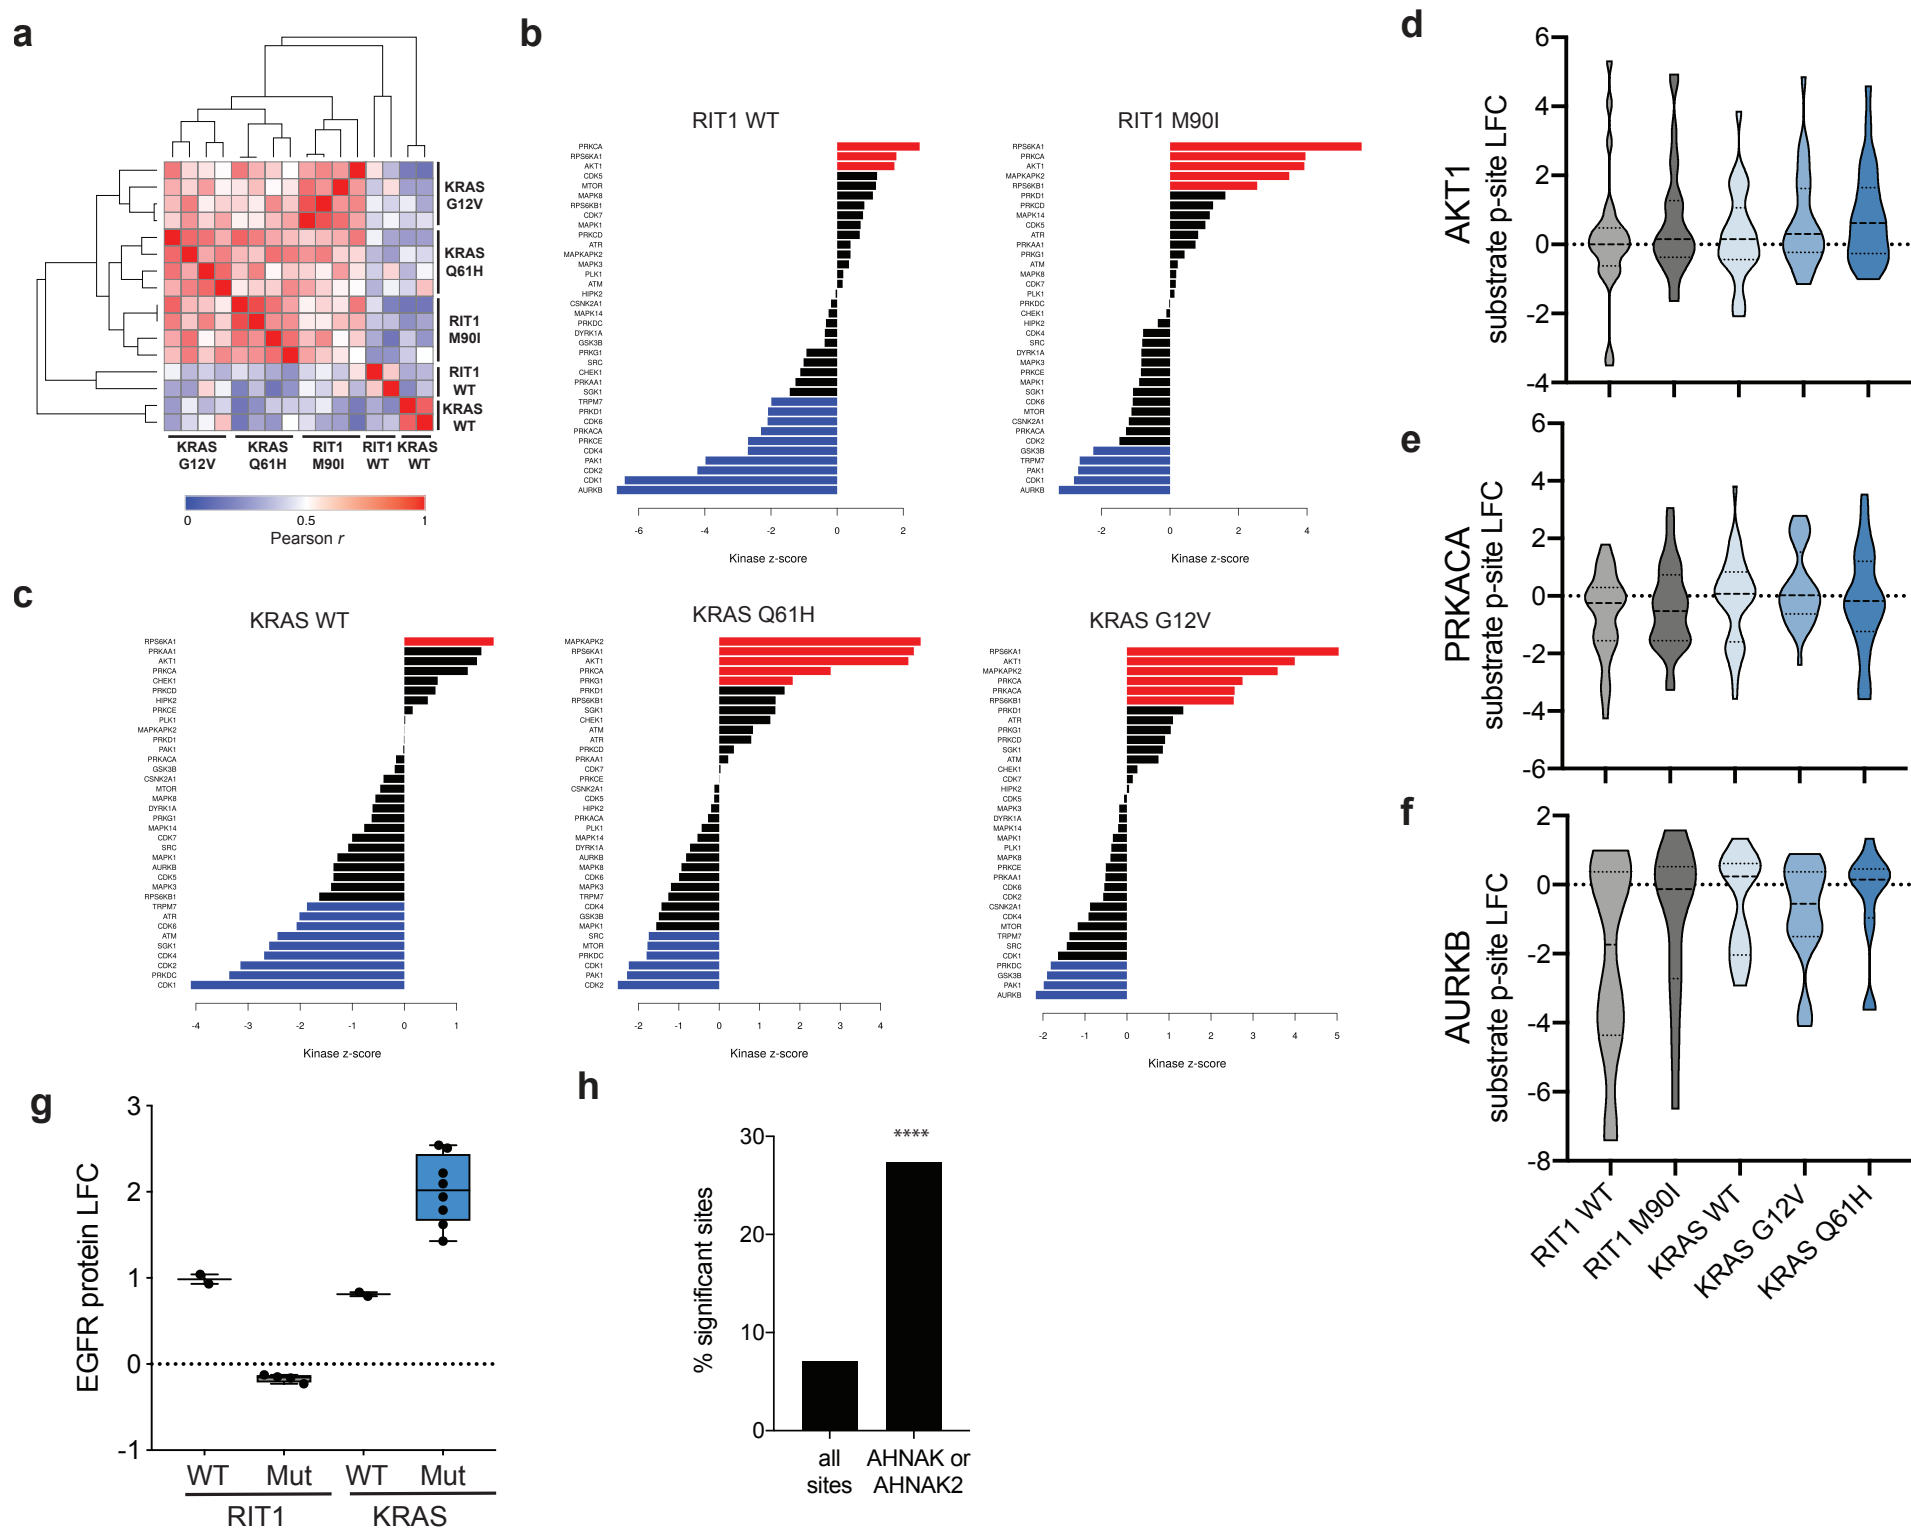

Supplement: Supplementary file [file media-1.pdf]
